# Supplementary material for: Development and evaluation of a deep learning approach for modeling seasonality and trends in hand-foot-mouth disease incidence in mainland China
Source: PubMed Central journal article supplement (PMC6541597; doi:10.1038/s41598-019-44469-9), 2019-05-29
Supplement: 41598_2019_44469_MOESM1_ESM.pdf [file 41598_2019_44469_MOESM1_ESM.pdf]

# **Supplementary information: Development and evaluation of a deep learning approach for modeling seasonality and trends in hand-foot-mouth disease incidence in mainland China**

Yongbin Wang<sup>1,+</sup>, Chunjie Xu<sup>2,+</sup>, Shengkui Zhang<sup>1</sup>, Li Yang<sup>1</sup>, Zhende Wang<sup>1</sup>, Ying Zhu<sup>1</sup>, Juxiang Yuan<sup>1,\*</sup>

<sup>1</sup> School of Public Health, North China University of Science and Technology, Tangshan, Hebei Province, P.R. China; 568019636@qq.com(Y.B.W.); 1527317477@qq.com(S.K.Z.); 593177072@qq.com(L.Y.); 9002629472@qq.com (Z.D.W.); 121545724@qq.com(Y.Z.)

<sup>2</sup> School of Public Health, Capital Medical University, Beijing 100069, P.R. China; 2248209559@qq.com(C.J.X.)

\* Corresponding author: Juxiang Yuan, No.21 Bohai Road, Caofeidian Xincheng, Tangshan City, Hebei Province, 063210, P.R. China; Tel: +86-315-8805002; e-mail: yuanjx@ncst.edu.cn

<sup>+</sup> These authors contributed equally to this work

## Supplementary Figure and Table captions

**Figure S1.** Systematic seasonal factors for HFMD notified cases at national level from June 2008 to June 2018 using the decomposition method. It can be seen that the reported cases HFMD series shows an apparent seasonality with the peak activities in April until July annually.

**Figure S2.** ACF and PACF graph with the first-order non-seasonal difference( $d=1$ ) of monthly HFMD incidence series in mainland China from June 2008 to June 2017. This plot suggests that after the first-order non-seasonal difference, the time-varying trend tends to stabilize approximately and there is a marked seasonal pattern owing to the local maximum values at lags 12, 24 and 36 in the ACF plot.

**Figure S3.** ACF and PACF graphs with the first-order seasonal difference( $D=1$ ) of monthly HFMD incidence series in mainland China from June 2008 to June 2017. Based on the plot, we can conclude that the differenced series has successfully been stationary.

**Figure S4.** The Q-Q plot of residuals from SARIMA(1,1,2)(1,1,0)<sub>12</sub> model for HFMD series from June 2008 to June 2017. This plot suggests that the distribution of produced residuals may have a tail thicker than that of a normal distribution.

**Figure S5.** Autocorrelation function(ACF) and partial autocorrelation function(PACF) graphs the first-order non-seasonal difference( $d=1$ ) of monthly HFMD incidence series in mainland China from June 2008 to December 2016. The plot shows that the differenced series looks much more stationary when compared with the original time series. Nonetheless there still is a marked seasonal pattern in this differenced series.

**Figure S6.** Autocorrelation function(ACF) and partial autocorrelation function(PACF) graphs with the first-order seasonal difference( $D=1$ ) of monthly HFMD incidence series in mainland China from

June 2008 to December 2016. Based on the plot, we may well consider the seasonal differenced series as a stationary series.

**Figure S7.** The resultant plots of fit goodness tests from SARIMA(1,0,1)(1,1,1)<sub>12</sub> model for HFMD notified cases series from June 2008 to December 2016. (a) Standardized residuals. (b) Autocorrelation function (ACF) graph of errors across varying lag times. None of the autocorrelation coefficients are out of the 95% confidence intervals in this residual series. (c) Partial autocorrelation function (PACF) graph of errors. (d) Q-statistic *P*-values. There are large *P* values at the significance level of 5%. Diagnostic checking indicates the chosen SARIMA specification can provide a reasonable approximation to the HFMD notified cases series from June 2008 to December 2016.

**Figure S8.** The Q-Q plot of residuals from SARIMA(1,0,1)(1,1,1)<sub>12</sub> model for HFMD series from June 2008 to December 2016. This plot suggests that the distribution of produced residuals has a tail thicker than that of a normal distribution.

**Figure S9.** Autocorrelation function(ACF) and partial autocorrelation function(PACF) graphs the first-order non-seasonal difference( $d=1$ ) of monthly HFMD incidence series in mainland China from June 2008 to December 2017. The plot shows that the differenced series looks much more stationary when compared with the original time series. Nonetheless there still is an obvious seasonal pattern in this differenced series.

**Figure S10.** Autocorrelation function(ACF) and partial autocorrelation function(PACF) graphs with the first-order seasonal difference( $D=1$ ) of monthly HFMD incidence series in mainland China from June 2008 to December 2017. On the basis of the plot, we can observe that this differenced series meets the need of modeling for SARIMA method.

**Figure S11.** The resultant plots of fit goodness tests from SARIMA(1,0,1)(1,1,1)<sub>12</sub> model for HFMD notified cases series from June 2008 to December 2017. (a) Standardized residuals. (b) Autocorrelation function (ACF) graph of errors across varying lag times. The spikes all fall within the 95% confidence intervals in this residual series. (c) Partial autocorrelation function (PACF) graph of errors. (d) *P* values for Ljung-Box statistic.. There are large *P* values at the significance level of 5%. Diagnostic checking indicates the chosen SARIMA specification is suitable for the HFMD notified cases series from June 2008 to December 2017.

**Figure S12.** The Q-Q plot of residuals from SARIMA(1,0,1)(1,1,1)<sub>12</sub> model for HFMD series from June 2008 to December 2017. This plot suggests that residuals are departure from normality at the tails.

**Figure S13.** The Q-Q plot of residuals from NAR model for HFMD series from June 2008 to June 2017. The Q-Q plot of the residuals shows departure from normality at the tails.

**Figure S14.** The regression plots for the NAR model outputs with respect to targets for training, validation, and test in the dataset from June 2008 to June 2017.

**Figure S15.** The layer architecture of NAR model for the HFMD notified cases series from June 2008 to December 2016. (A) The opened loop mode; (B) The closed loop mode. This NAR model is comprised of a hidden layer with 17 neurons and 5 delays and an output layer with 1 neuron. The model adopts tapped delay lines to store prior data of the  $x(t)$  and  $y(t)$  series as well. Among which, the output results of the model,  $y(t)$ , is fed back to the input (through delays), since  $y(t)$  is a function of  $y(t - 1)$ ,  $y(t - 2)$ , ...,  $y(t - d)$ . Nevertheless, in order to train more efficiently, the training can be undertaken in open loop. After training, then the opened loop mode should be transformed to the closed loop mode for multistep-ahead forecasting.

**Figure S16.** The resulting plots of fit goodness tests from the best-fitting NAR model for HFMD notified cases series from June 2008 to December 2016. (a) Standardized residuals. (b) Autocorrelation function (ACF) plot of errors across varying lag times. All of the autocorrelations fail to be beyond the estimated 95% uncertainty bounds around zero across varying lag times apart from the one from ACF plot at zero lag that should occur and also occurring at lag 11, we should not be surprised as this can easily happen by chance alone. Overall, the plot manifests that the network appears to have captured the dependence hidden behind the HFMD notified cases series. (c) Input-to-error correlation plot for varying lags. The input-error cross-correlation function illustrates how the residuals are interrelated with the series of  $x(t)$ . All of the correlations fall within the confidence bounds around zero, which hints the developed model is a perfect specification. (d) Q-statistic  $P$ -values. Analyses from the plots demonstrate the constructed model is adequate in excavating the information of this time series.

**Figure S17.** The response of output and target for HFMD time series from June 2008 to December 2016 at various time points. This plot exhibits which time points are elected as the training, validation and testing subsets, along with their corresponding errors between inputs and targets. In view of the small errors, a further suggestion that the fitting is fairly accurate.

**Figure S18.** The regression plots for the best-fitting NAR model outputs with respect to targets for training, validation, and test in the dataset from June 2008 to December 2016.

**Figure S19.** The Q-Q plot of residuals from NAR model for HFMD series from June 2008 to December 2016. The Q-Q plot of the residuals shows marked departure from normality at the tails.

**Figure S20.** The layer architecture of NAR model for HFMD notified cases series from June 2008 to December 2017. (A) The opened loop mode; (B) The closed loop mode. This NAR model is

comprised of a hidden layer with 19 neurons and 6 delays and an output layer with 1 neuron. The model adopts tapped delay lines to store prior data of the  $x(t)$  and  $y(t)$  series as well. Among which, the output results of the model,  $y(t)$ , is fed back to the input (through delays), since  $y(t)$  is a function of  $y(t - 1)$ ,  $y(t - 2)$ , ...,  $y(t - d)$ . Nevertheless, in order to train more efficiently, the training can be undertaken in open loop. After training, then the opened loop mode should be transformed to the closed loop mode for multistep-ahead forecasting.

**Figure 21.** The resulting plots of fit goodness tests from the best-fitting NAR model for HFMD notified cases series from June 2008 to December 2017. (a) Standardized residuals. (b) Autocorrelation function (ACF) plot of errors across varying lag times. All of the autocorrelations fail to be beyond the estimated 95% uncertainty bounds around zero across varying lag times apart from the one from ACF plot at zero lag that should occur. The plot manifests that the network appears to have captured the dependence hidden behind the HFMD notified cases series. (c) Input-to-error correlation plot for varying lags. The input-error cross-correlation function illustrates how the residuals are interrelated with the series of  $x(t)$ . All of the correlations fall within the confidence bounds around zero, which hints the developed model is a perfect specification. (d) Q-statistic  $P$ -values. Analyses from the plots demonstrate the constructed model is adequate in excavating the information of this time series.

**Figure S22.** The response of output and target for HFMD time series from June 2008 to December 2017 at various time points. This plot exhibits which time points are elected as the training, validation and testing subsets, along with their corresponding errors between inputs and targets. In view of the small errors nearly lying between -0.2 and 0.2, a further suggestion that the fitting is fairly accurate.

**Figure S23.** The regression plots for the best-fitting NAR model outputs with respect to targets for training, validation, and test in the dataset from June 2008 to December 2017.

**Figure S24.** The Q-Q plot of residuals from the best-simulating NAR model for HFMD series from June 2008 to December 2017. This plot suggests that the distribution of produced residuals has a tail thicker than that of a normal distribution.

**Figure S25.** The regression plots for the LSTM model outputs with respect to targets for training and validation in the dataset from June 2008 to June 2017.

**Figure S26.** The Q-Q plot of residuals from LSTM model for HFMD series from June 2008 to June 2017. As exhibited in the plot of the normal Q-Q plot, the residuals approximately fall along the line. Thus the best-fitting LSTM model improves the normality dramatically compared with the basic NAR and SARIMA methods.

**Figure S27.** The training and validation performances for LSTM model at 300 epochs for the HFMD notified cases series from June 2008 to December 2016. This plot documents that the test set error and the validation set error have similar characteristics and no significant overfitting has occurred by iteration 300.

**Figure S28.** The resulting plots of fit goodness tests from the best-performing LSTM model for HFMD notified cases series from June 2008 to December 2016. (a) Standardized residuals. (b) Autocorrelation function (ACF) plot of errors across varying lag times. The ACF plot of forecasted errors reveals no individually evident autocorrelation at varying lags except for the one from ACF plot at zero lag that should occur. (c) Partial autocorrelation function (PACF) plot of residuals. (d) Q-statistic  $P$ -values. As shown, All  $P$ -values are larger than 0.05. These diagnostics manifest that the network is well suited to the dataset.

**Figure S29.** The regression plots for the best-presenting LSTM model outputs with respect to targets for training and validation in the dataset from June 2008 to December 2016.

**Figure S30.** The Q-Q plot of residuals from LSTM model for HFMD series from June 2008 to December 2016. As exhibited in the plot of the normal Q-Q plot, the points seem to follow the straight line fairly closely. This graph would not lead us to reject normality of the error terms in this model. Thus the best-fitting LSTM model improves the normality dramatically compared with the basic NAR and SARIMA methods.

**Figure S31.** The training and validation performances for LSTM model at 300 epochs for the HFMD notified cases series from June 2008 to December 2017. This plot documents that the test set error and the validation set error have similar characteristics and no significant overfitting has occurred by iteration 300.

**Figure S32.** The resulting plots of fit goodness tests from the LSTM model for HFMD notified cases series from June 2008 to December 2017. (a) Standardized residuals. (b) Autocorrelation function (ACF) plot of errors across varying lag times. The ACF plot of forecasted errors reveals no individually evident autocorrelation at varying lags except for the two points occurring at lags 2 and 15. For these two lagged points out of the estimated 95% confidence limit, they are also reasonable as this phenomenon can easily happen by chance alone. (c) Partial autocorrelation function (PACF) plot of residuals. (d) Q-statistic *P*-values. As shown, All *P*-values are larger than 0.05. These diagnostics manifest that the network is well suited to the dataset.

**Figure S33.** The regression plots for the best-presenting LSTM model outputs with respect to targets for training and validation in the dataset from June 2008 to December 2017.

**Figure S34.** The Q-Q plot of residuals from LSTM model for HFMD series from June 2008 to December 2017. The Q-Q plot suggests that the distribution of errors may have a tail thicker than that of a normal distribution and may be somewhat skewed to the right. However, In comparison



with the best-mimicking NAR and SARIMA approaches, the best-fitting LSTM model can improve the normality dramatically.

**Figure S35.** The layer architecture of NAR model for the HFMD notified cases series from June 2008 to June 2017. (A) The opened loop mode; (B) The closed loop mode. This NAR model is comprised of a hidden layer with 18 neurons and 5 delays and an output layer with 1 neuron. The model adopts tapped delay lines to store prior data of the  $x(t)$  and  $y(t)$  series as well. Among which, the output results of the model,  $y(t)$ , is fed back to the input (through delays), since  $y(t)$  is a function of  $y(t - 1)$ ,  $y(t - 2)$ , ...,  $y(t - d)$ . Nevertheless, in order to train more efficiently, the training can be undertaken in open loop. After training, then the opened loop mode should be transformed to the closed loop mode for multistep-ahead forecasting.

**Figure S36.** The layer architecture of LSTM model. Above-mentioned these gates represent nonlinear summation units that gather activations from inside and outside the block, and dominate the activation of the cell via multiplications (small black circles). The input and output gates multiply the cell's input and output when the forget gate multiplies the earlier state of the cell. The gate activation function 'f' ordinarily refers to the logistic sigmoid, which can limit the gate activations into  $[0, 1]$  intervals. The cell input and output activation functions ('g' and 'h') customarily stand for tanh or logistic sigmoid. In this layer architecture, dashed lines are the weighted join points from the cell to the gates, the remainder of lines within the block denote the unweighted join points. The only outputs from the block to the remaining the network emanate from the output gate multiplication.

**Table S1.** The estimated parameters and performance indexes for the selected candidate models based on the original observations from June 2008 to June 2017.

**Table S2.** Estimated parameters of the SARIMA(1,0,1)(1,1,1)<sub>12</sub> model for the target series from June 2008 to December 2016.

**Table S3.** The goodness of fit test of the preferred SARIMA model for the target series from June 2008 to December 2016.

**Table S4.** Ljung-Box  $Q$  test of the residuals for the selected three optimal models fitted to the notified HFMD cases series from June 2008 to December 2016 at different lags.

**Table S5.** ARCH effect of the observations and residuals of the selected three models fitted to the notified HFMD cases series from June 2008 to December 2016 with LM test at various lags.

**Table S6.** Estimated parameters of the SARIMA(1,0,1)(1,1,1)<sub>12</sub> model for the target series from June 2008 to December 2017.

**Table S7.** The goodness of fit test of the preferred SARIMA model for target series from June 2008 to December 2017.

**Table S8.** Ljung-Box  $Q$  test of the residuals for the selected three optimal models fitted to the notified HFMD cases series from June 2008 to December 2017 at different lags.

**Table S9.** ARCH effect of the observations and residuals of the selected three models fitted to the notified HFMD cases series from June 2008 to December 2017 with LM test at various lags.

**Table S10.** The preferred NAR models' parameters of various target series.

**Table S11.** The preferred LSTM models' parameters of various target series.

**Table S12.** Future one hundred possible sample paths for the HFMD notified data in mainland China. This Table was provided in a Microsoft Excel.xlsx version on account of the plethora of data.

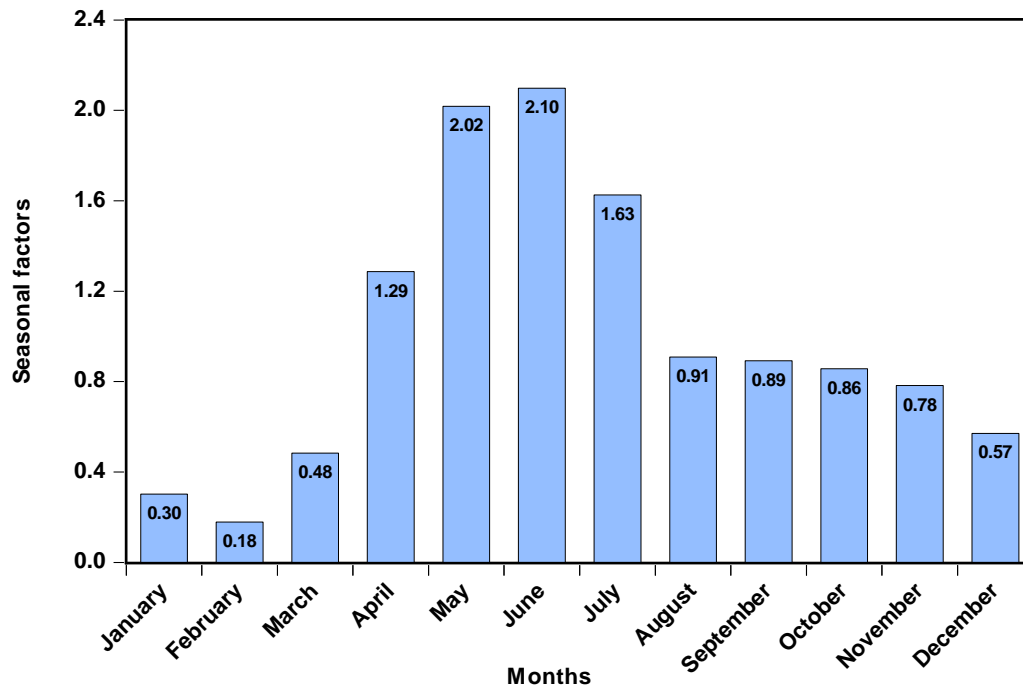

**Figure S1.** Systematic seasonal factors for HFMD notified cases at national level from June 2008 to June 2018 using the decomposition method. It can be seen that the reported cases HFMD series shows an apparent seasonality with the peak activities in April until July annually.

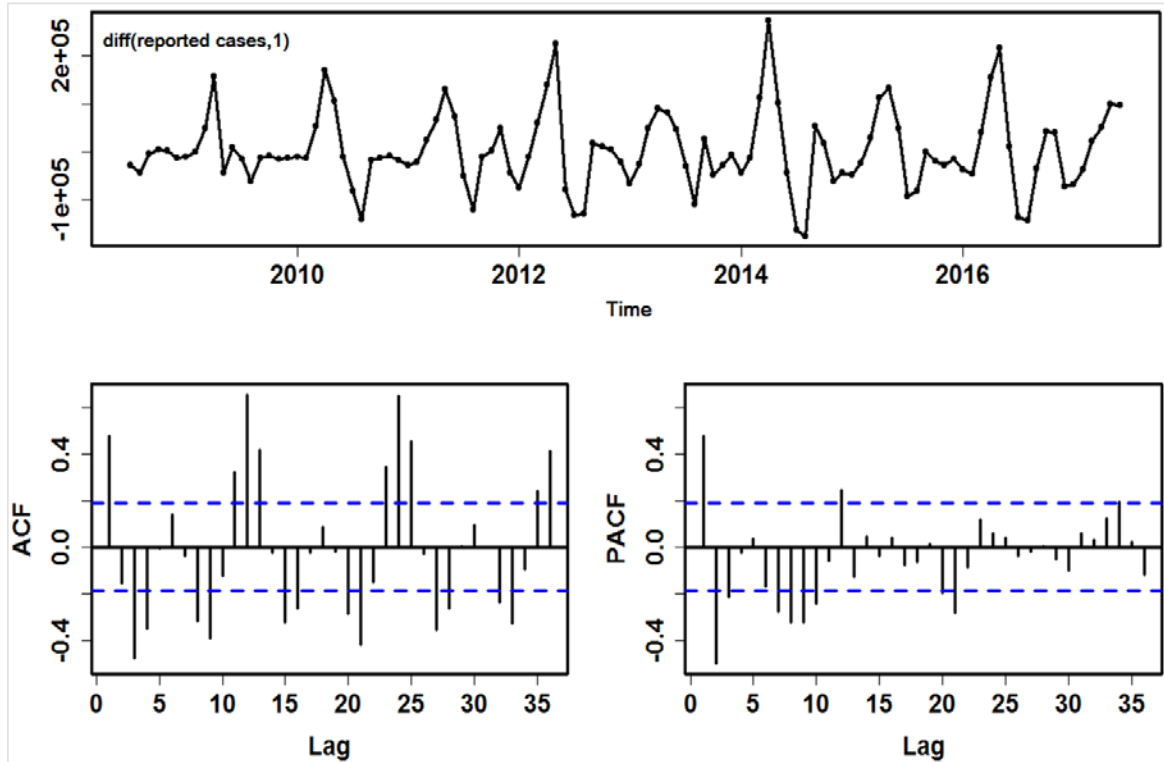

**Figure S2.** ACF and PACF graph with the first-order non-seasonal difference( $d=1$ ) of monthly HFMD incidence series in mainland China from June 2008 to June 2017. This plot suggests that after the first-order non-seasonal difference, the time-varying trend tends to stabilize approximately and there is a marked seasonal pattern owing to the local maximum values at lags 12, 24 and 36 in the ACF plot.

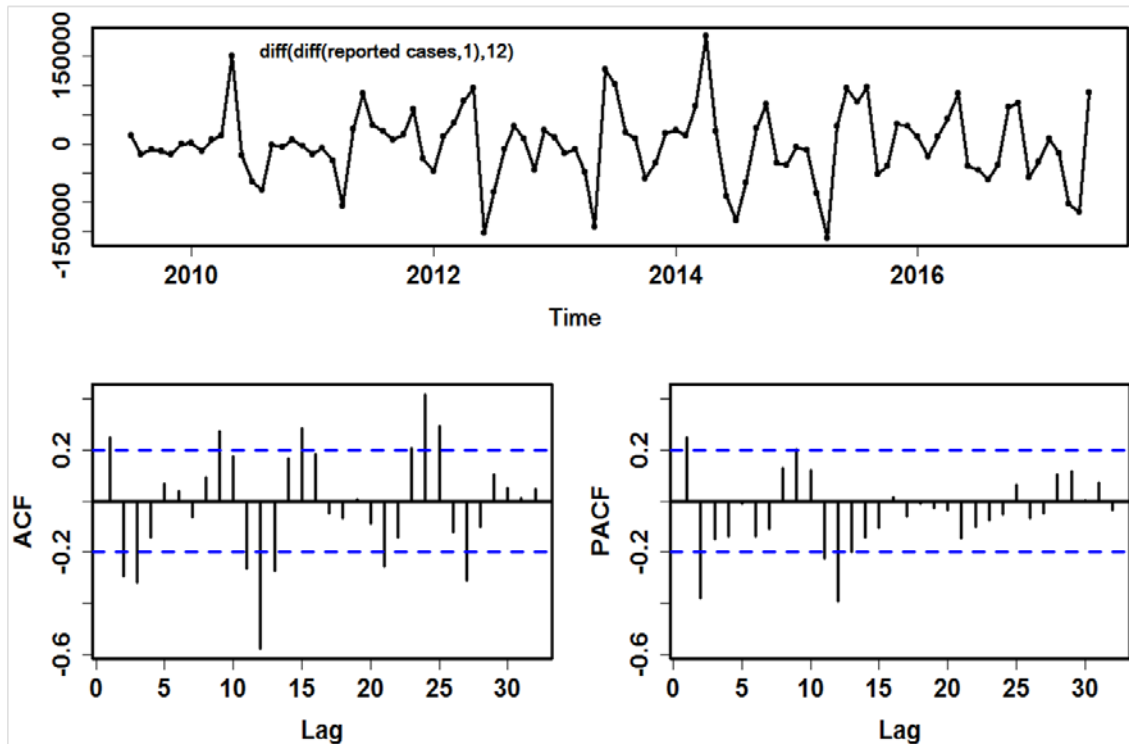

**Figure S3.** ACF and PACF graphs with the first-order seasonal difference ( $D=1$ ) of monthly HFMD incidence series in mainland China from June 2008 to June 2017. Based on the plot, we can conclude that the differenced series has successfully been stationary.

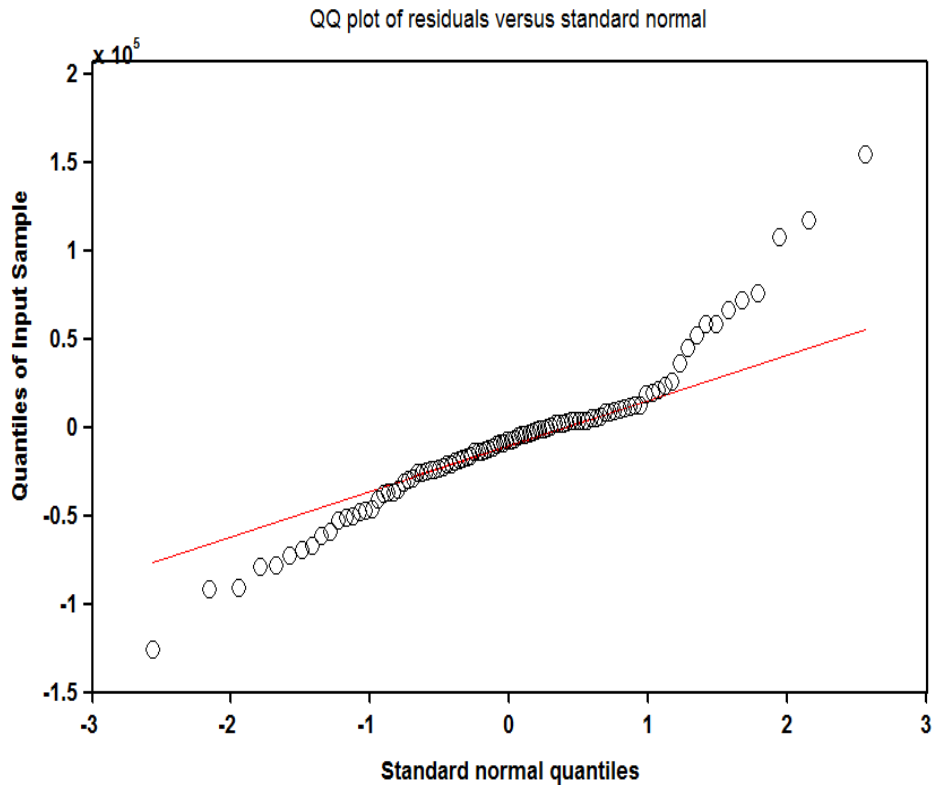

**Figure S4.** The Q-Q plot of residuals from SARIMA(1,1,2)(1,1,0)<sub>12</sub> model for HFMD series from June 2008 to June 2017. This plot suggests that the distribution of produced residuals may have a tail thicker than that of a normal distribution.

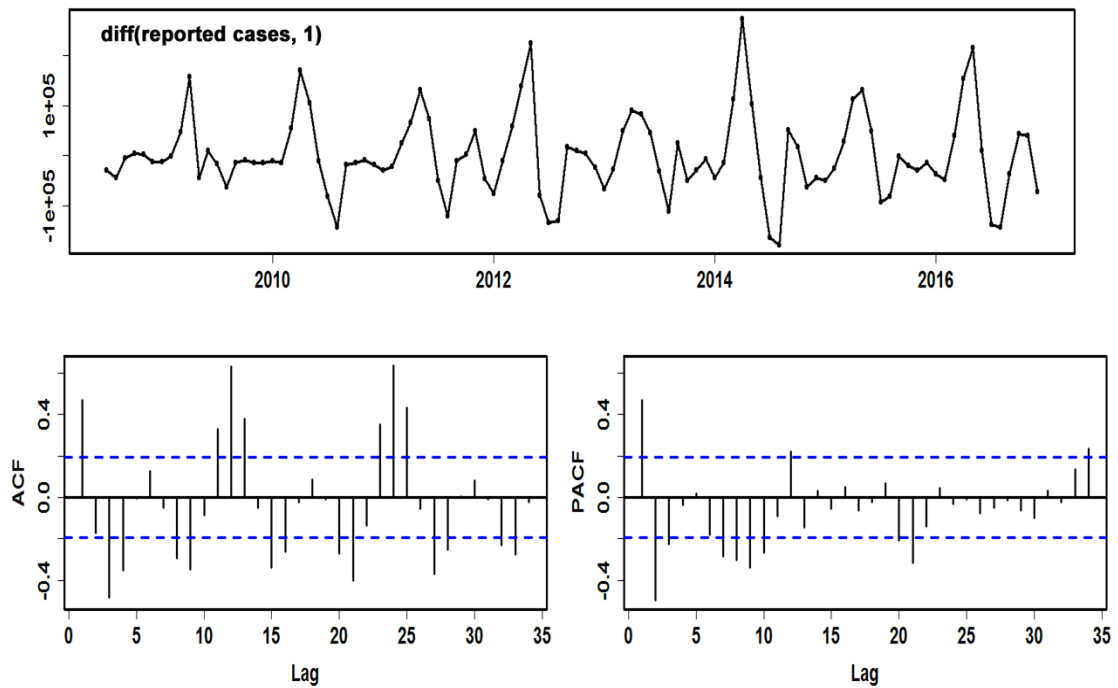

**Figure S5.** Autocorrelation function(ACF) and partial autocorrelation function(PACF) graphs the first-order non-seasonal difference( $d=1$ ) of monthly HFMD incidence series in mainland China from June 2008 to December 2016. The plot shows that the differenced series looks much more stationary when compared with the original time series. Nonetheless there still is a marked seasonal pattern in this differenced series.

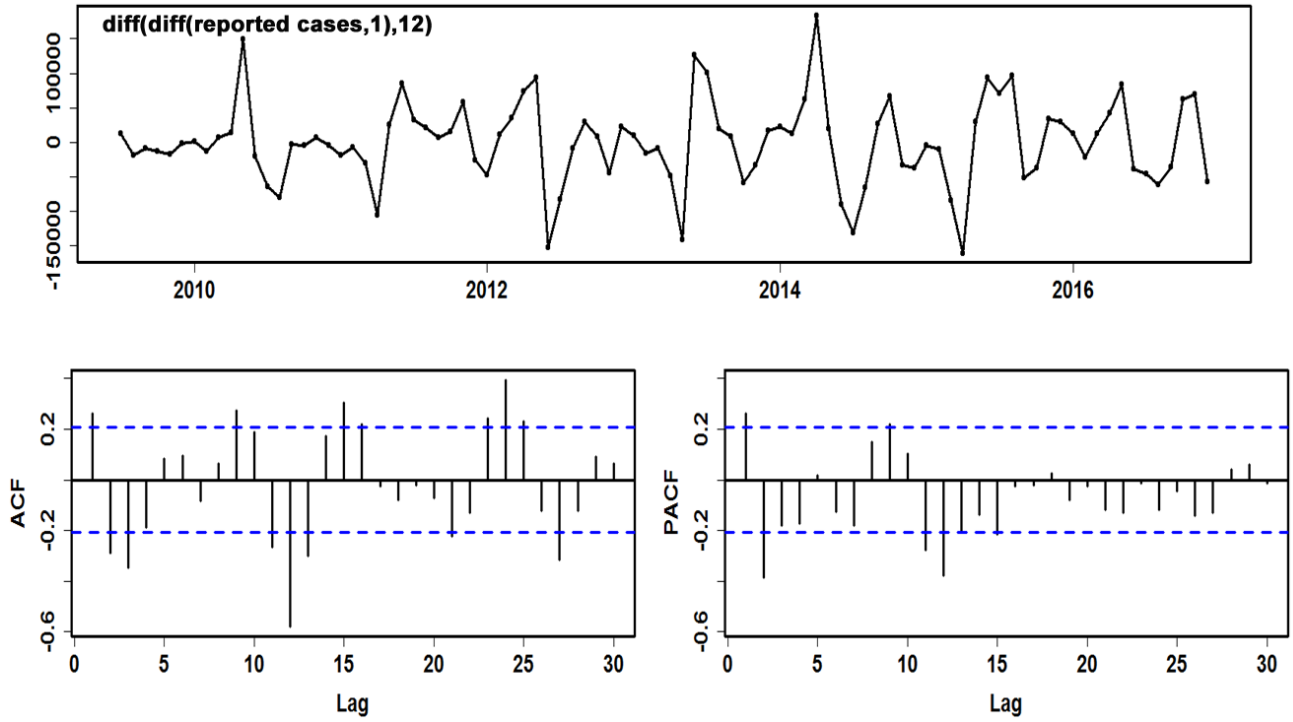

**Figure S6.** Autocorrelation function(ACF) and partial autocorrelation function(PACF) graphs with the first-order seasonal difference( $D=1$ ) of monthly HFMD incidence series in mainland China from June 2008 to December 2016. Based on the plot, we may well consider the seasonal differenced series as a stationary series.



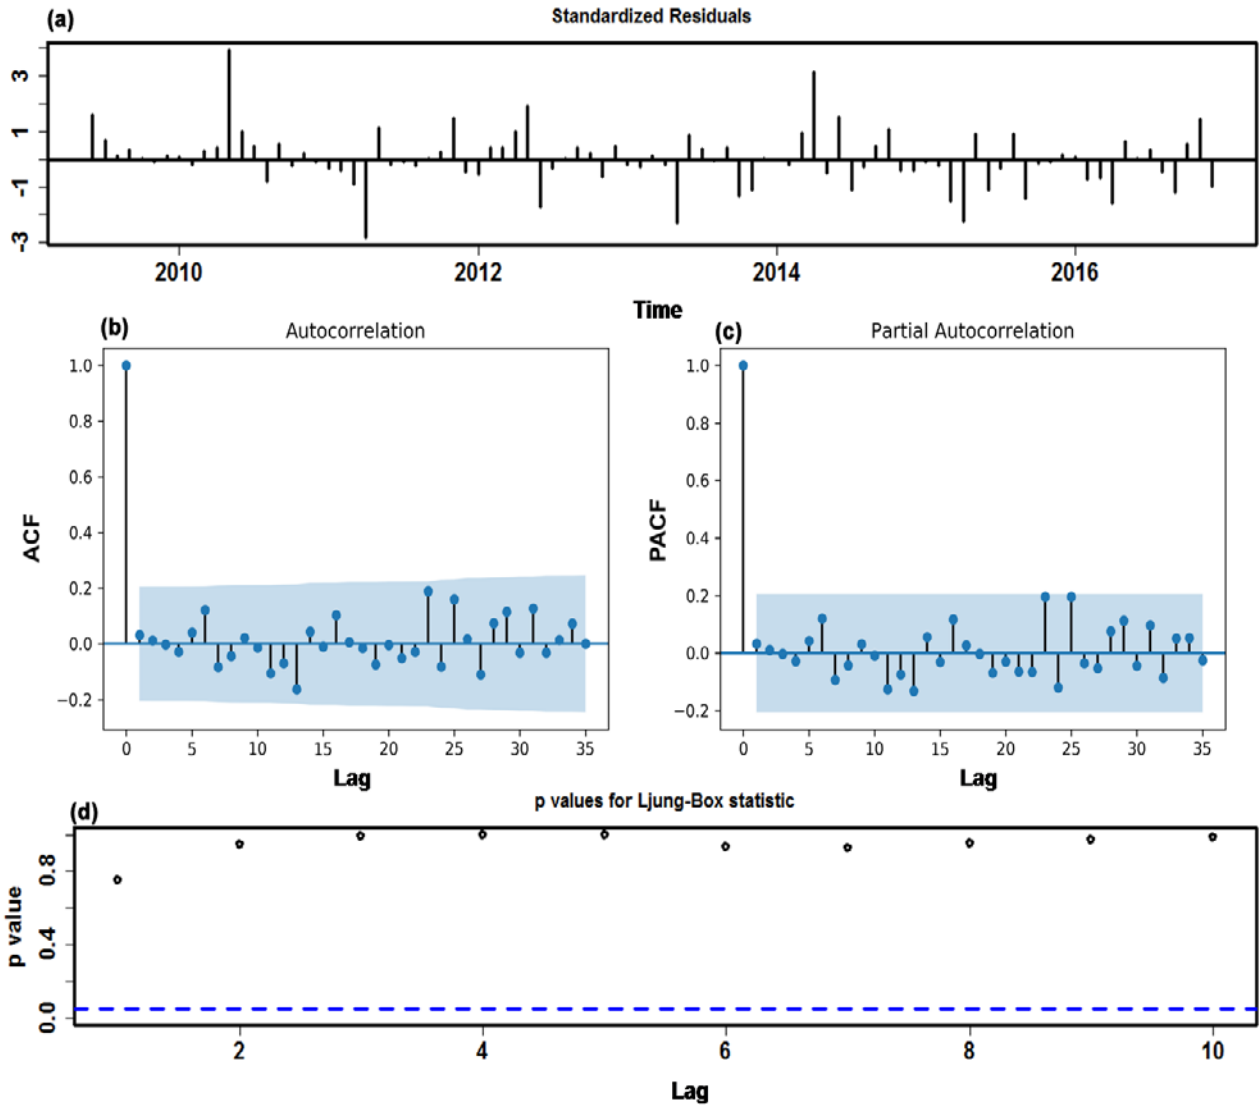

**Figure S7.** The resultant plots of fit goodness tests from SARIMA(1,0,1)(1,1,1)<sub>12</sub> model for HFMD notified cases series from June 2008 to December 2016. (a) Standardized residuals. (b) Autocorrelation function (ACF) graph of errors across varying lag times. None of the autocorrelation coefficients are out of the 95% confidence intervals in this residual series. (c) Partial autocorrelation function (PACF) graph of errors. (d) Q-statistic *P*-values. There are large *P* values at the significance level of 5%. Diagnostic checking indicates the chosen SARIMA specification can provide a reasonable approximation to the HFMD notified cases series from June 2008 to December 2016.

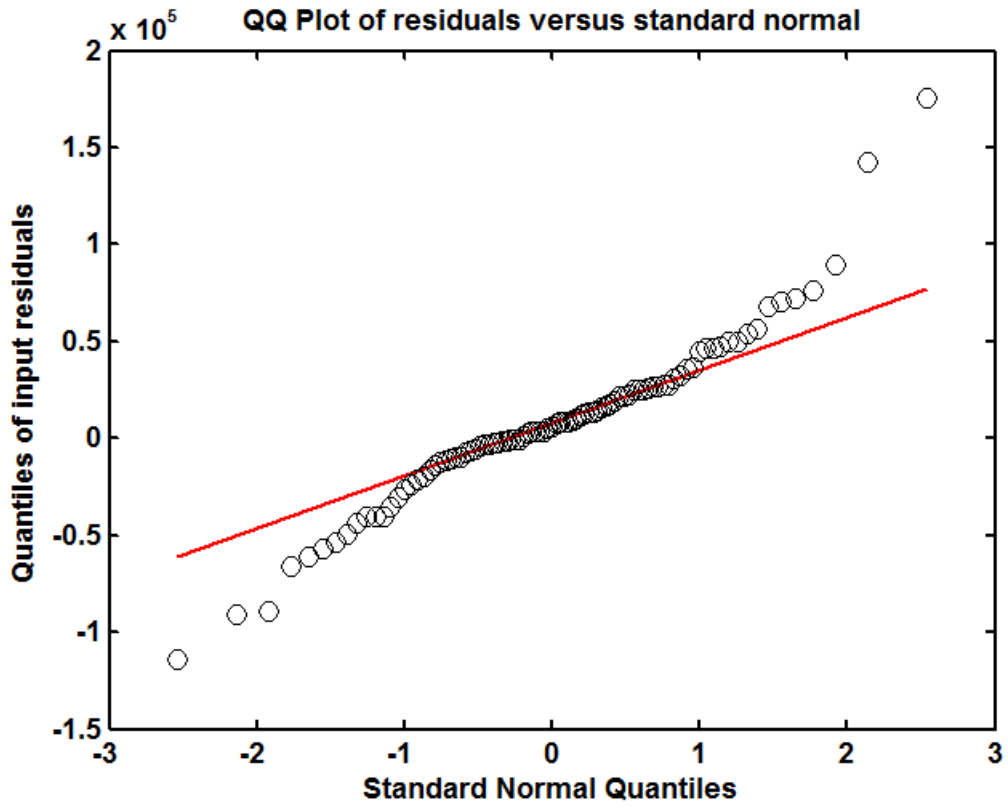

**Figure S8.** The Q-Q plot of residuals from SARIMA(1,0,1)(1,1,1)<sub>12</sub> model for HFMD series from June 2008 to December 2016. This plot suggests that the distribution of produced residuals has a tail thicker than that of a normal distribution.

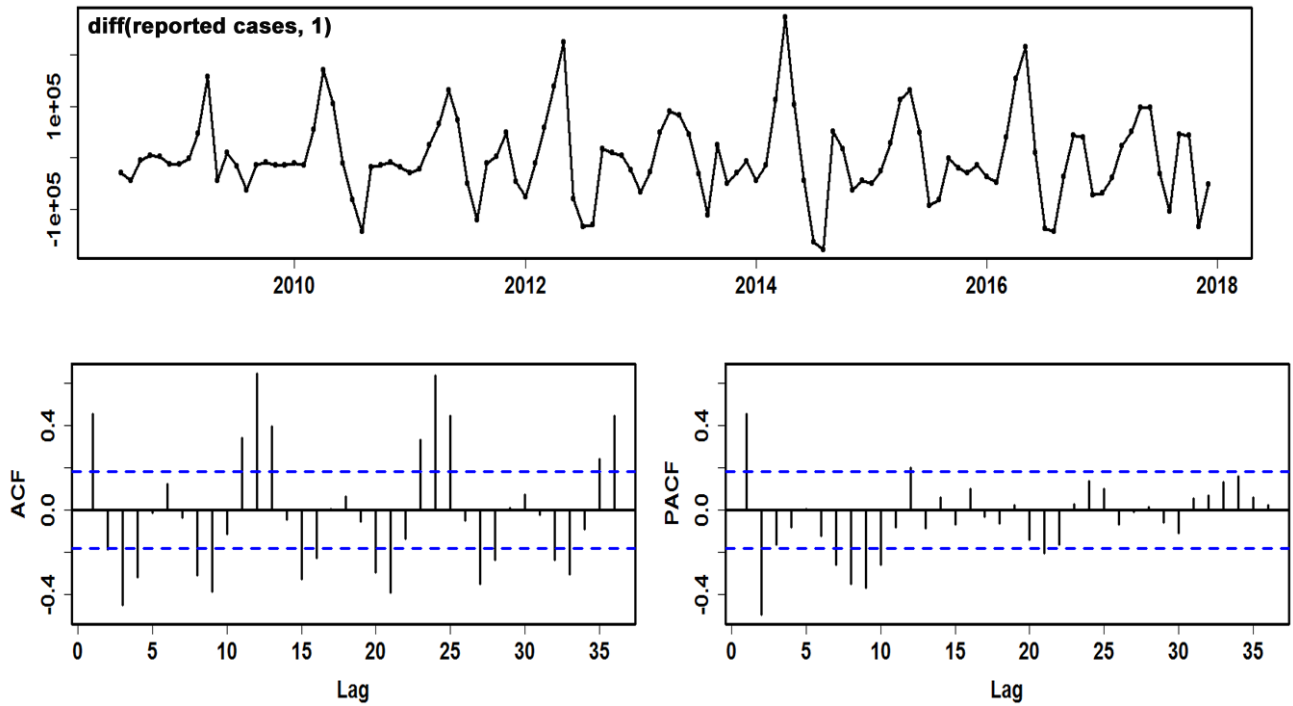

**Figure S9.** Autocorrelation function(ACF) and partial autocorrelation function(PACF) graphs the first-order non-seasonal difference( $d=1$ ) of monthly HFMD incidence series in mainland China from June 2008 to December 2017. The plot shows that the differenced series looks much more stationary when compared with the original time series. Nonetheless there still is an obvious seasonal pattern in this differenced series.

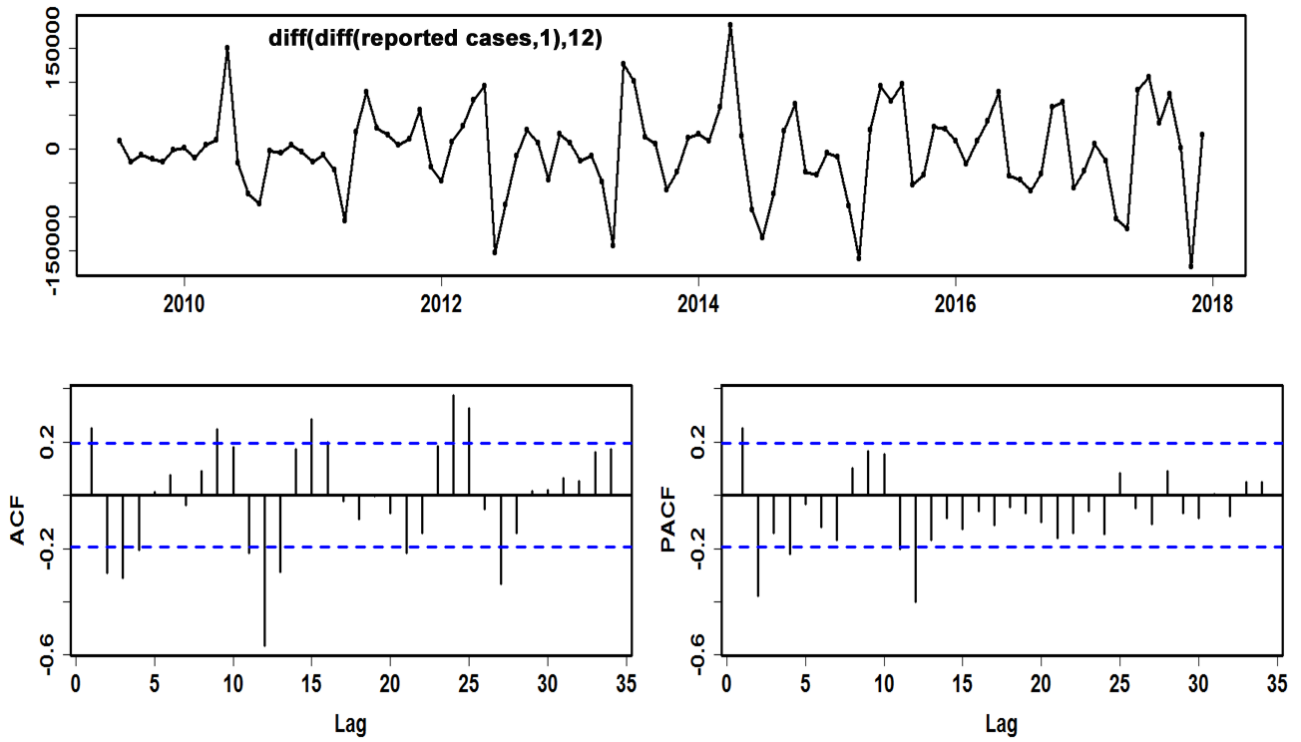

**Figure S10.** Autocorrelation function(ACF) and partial autocorrelation function(PACF) graphs with the first-order seasonal difference( $D=1$ ) of monthly HFMD incidence series in mainland China from June 2008 to December 2017. On the basis of the plot, we can observe that this differenced series meets the need of modeling for SARIMA method.

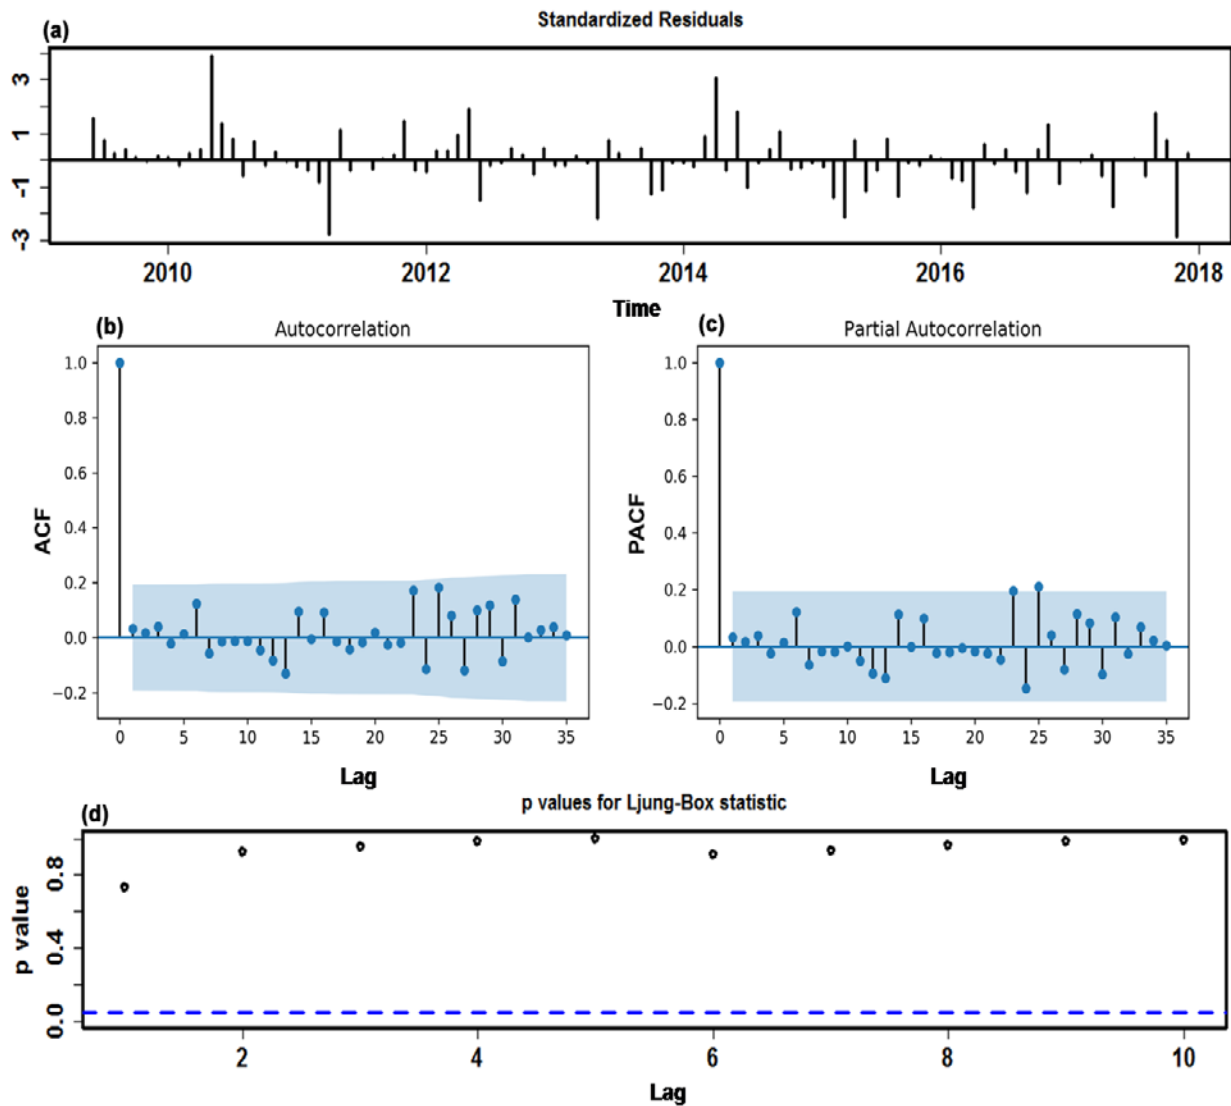

**Figure S11.** The resultant plots of fit goodness tests from SARIMA(1,0,1)(1,1,1)<sub>12</sub> model for HFMD notified cases series from June 2008 to December 2017. (a) Standardized residuals. (b) Autocorrelation function (ACF) graph of errors across varying lag times. The spikes all fall within the 95% confidence intervals in this residual series. (c) Partial autocorrelation function (PACF) graph of errors. (d) *P* values for Ljung-Box statistic.. There are large *P* values at the significance level of 5%. Diagnostic checking indicates the chosen SARIMA specification is suitable for the HFMD notified cases series from June 2008 to December 2017.

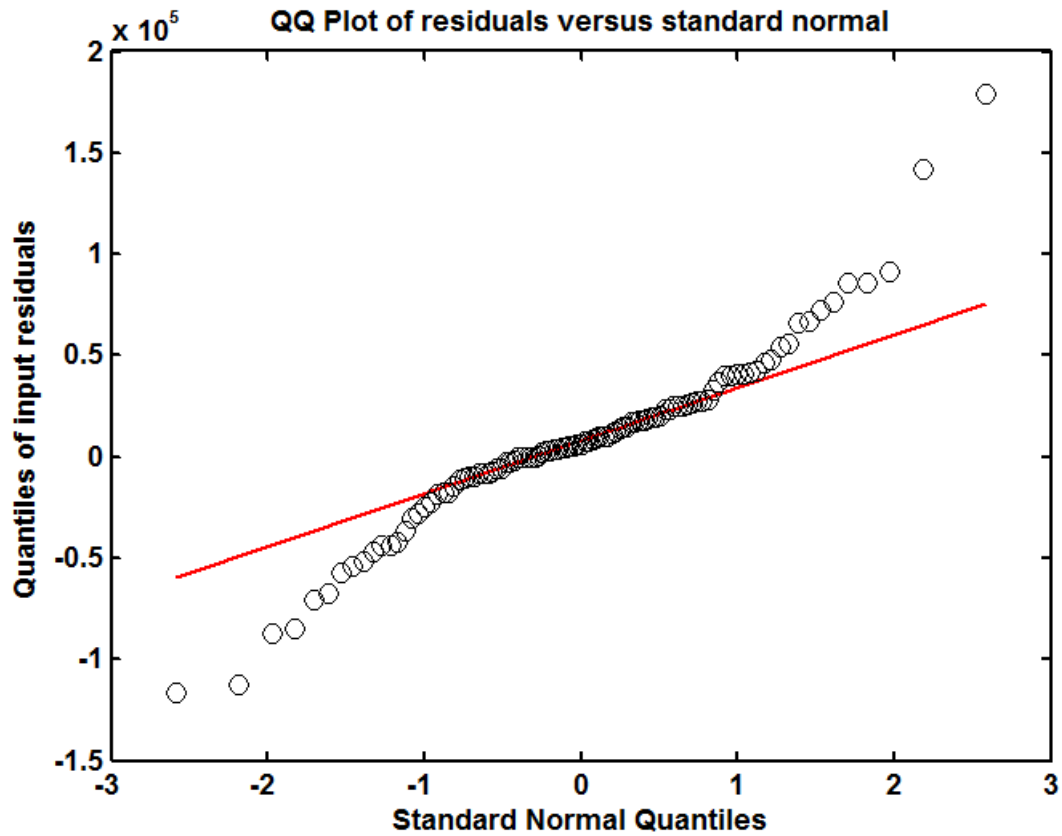

**Figure S12.** The Q-Q plot of residuals from SARIMA(1,0,1)(1,1,1)<sub>12</sub> model for HFMD series from June 2008 to December 2017. This plot suggests that residuals are departure from normality at the tails.

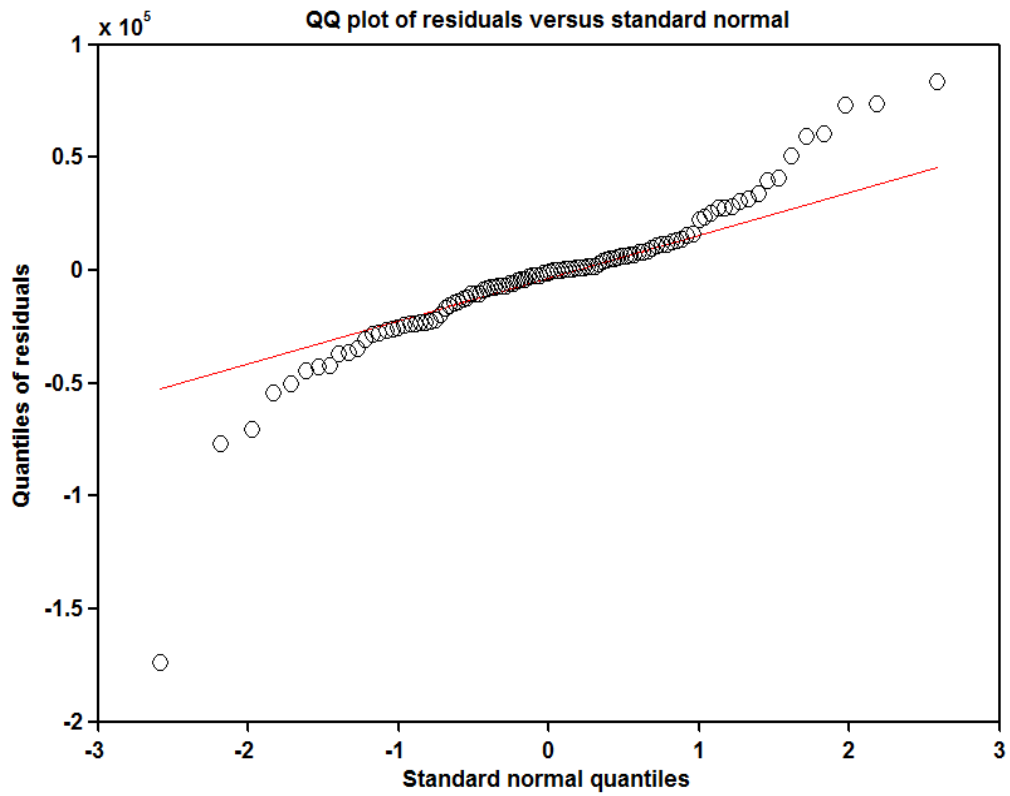

**Figure S13.** The Q-Q plot of residuals from NAR model for HFMD series from June 2008 to June 2017. The Q-Q plot of the residuals shows departure from normality at the tails.

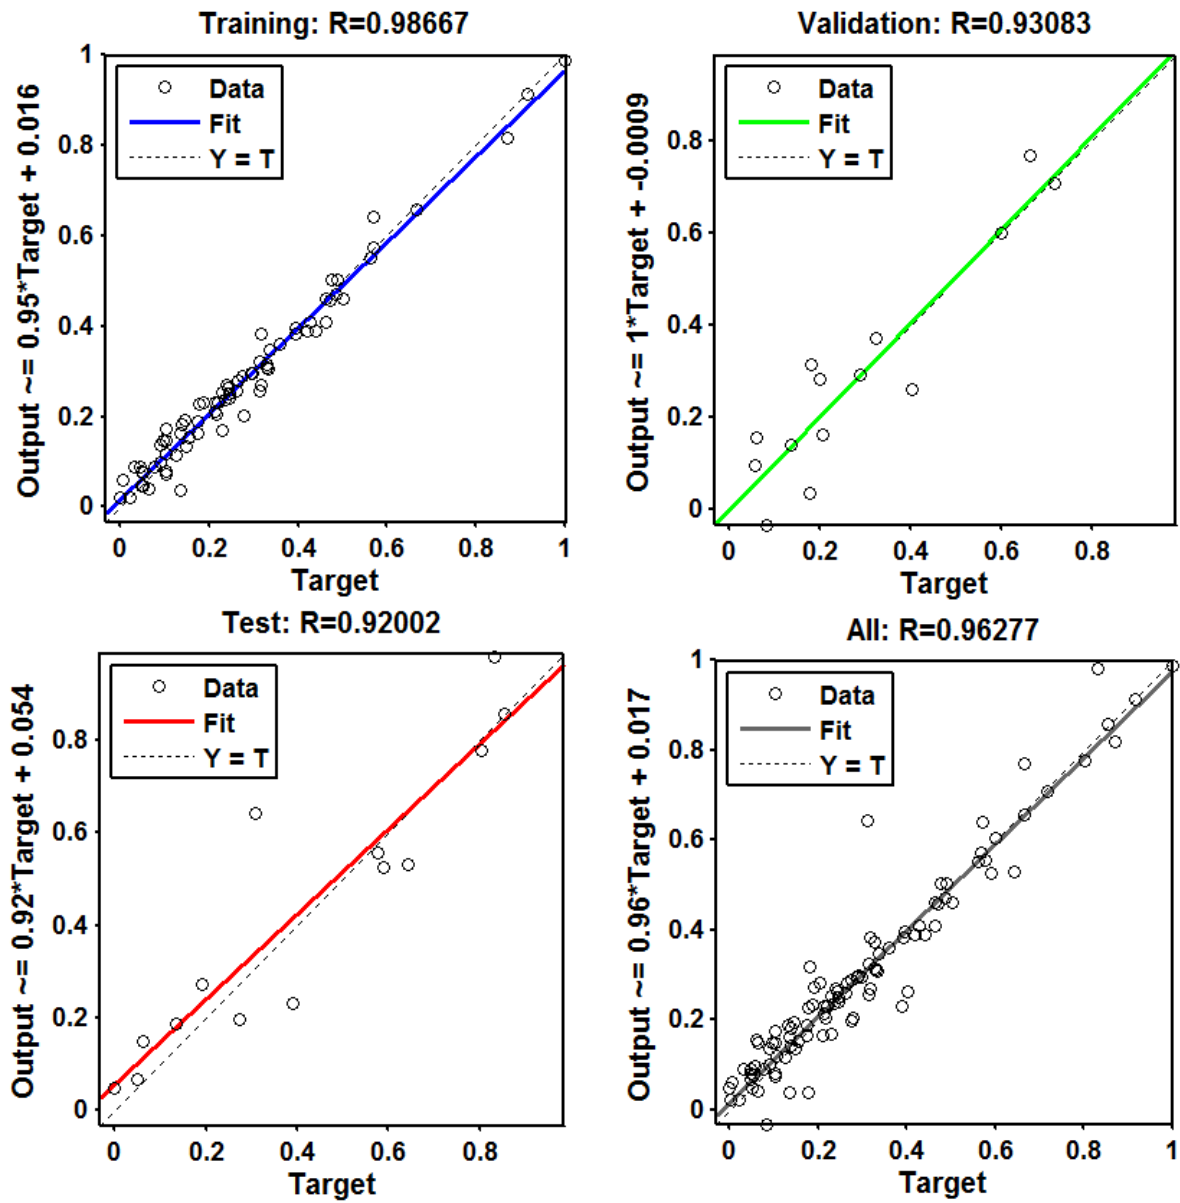

**Figure S14.** The regression plots for the NAR model outputs with respect to targets for training, validation, and test in the dataset from June 2008 to June 2017.



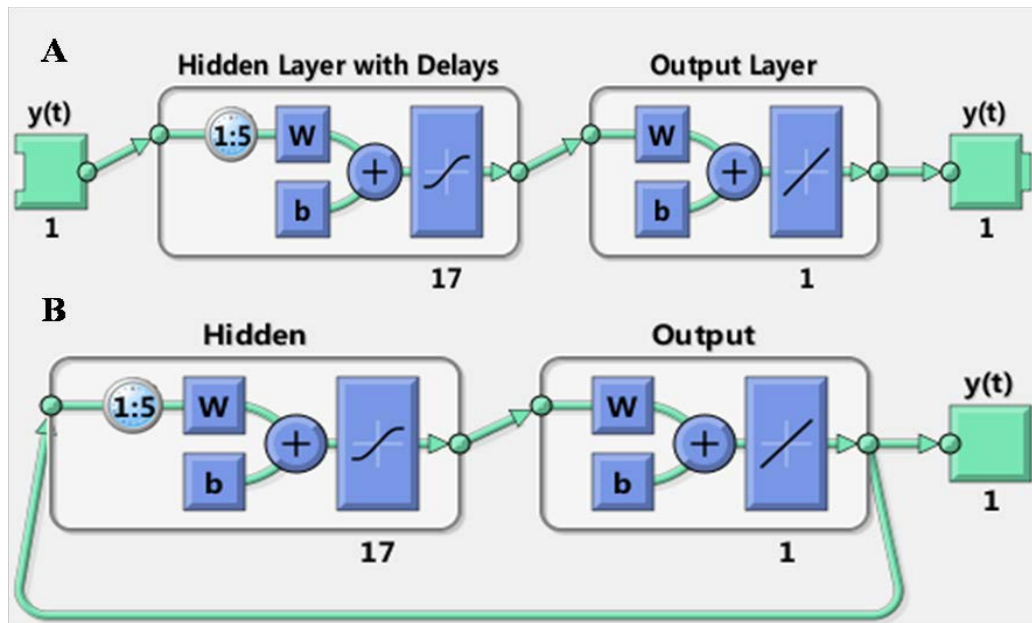

**Figure S15.** The layer architecture of NAR model for the HFMD notified cases series from June 2008 to December 2016. (A) The opened loop mode; (B) The closed loop mode. This NAR model is comprised of a hidden layer with 17 neurons and 5 delays and an output layer with 1 neuron. The model adopts tapped delay lines to store prior data of the  $x(t)$  and  $y(t)$  series as well. Among which, the output results of the model,  $y(t)$ , is fed back to the input (through delays), since  $y(t)$  is a function of  $y(t - 1)$ ,  $y(t - 2)$ , ...,  $y(t - d)$ . Nevertheless, in order to train more efficiently, the training can be undertaken in open loop. After training, then the opened loop mode should be transformed to the closed loop mode for multistep-ahead forecasting.

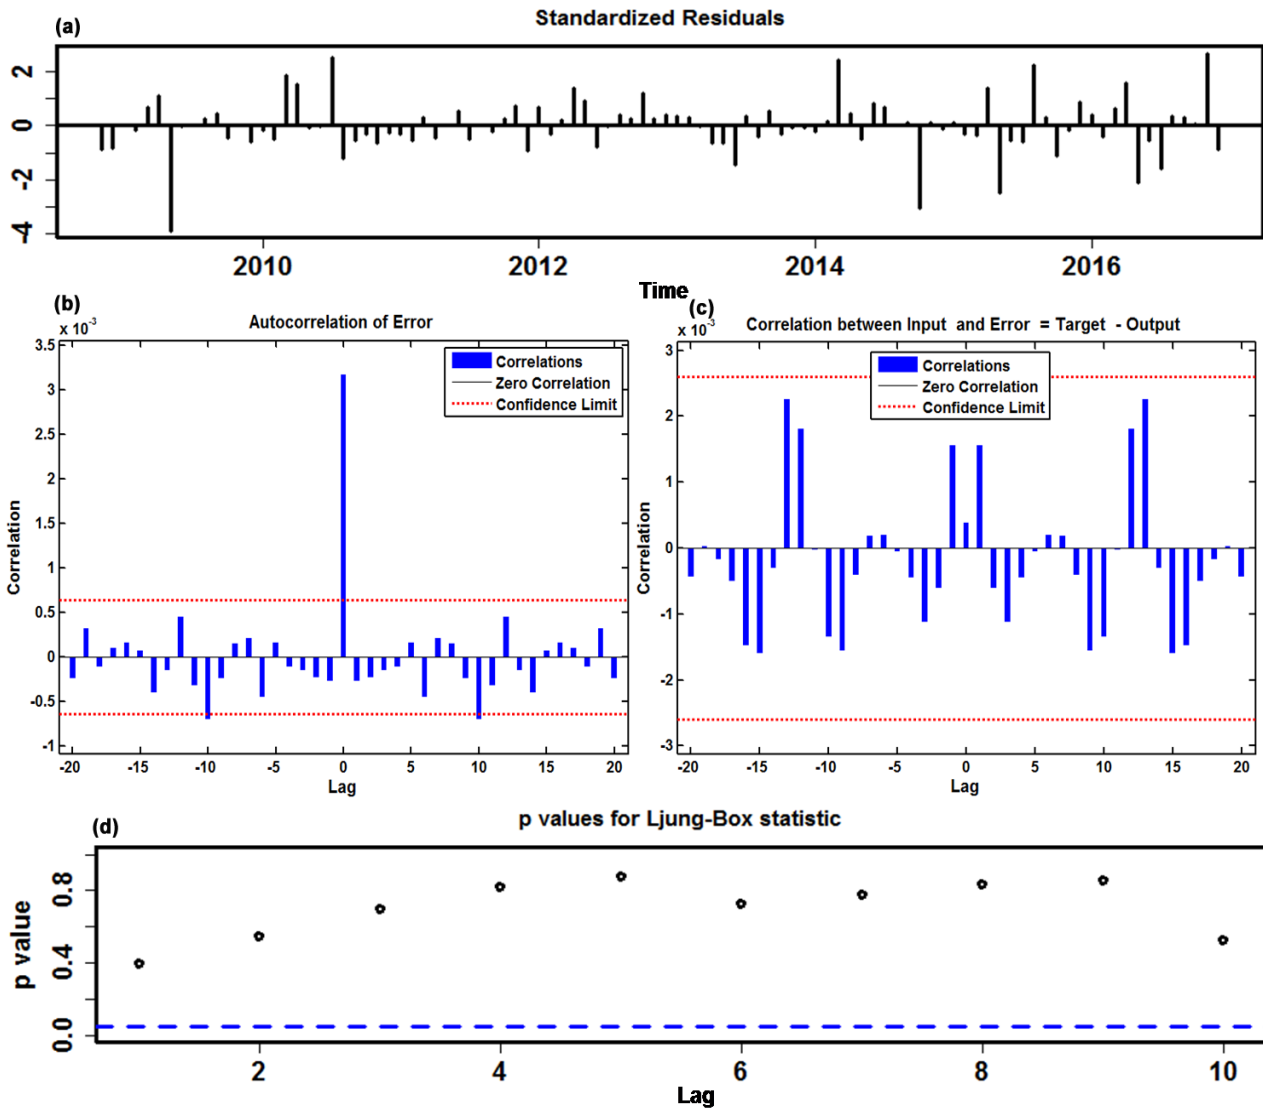

**Figure S16.** The resulting plots of fit goodness tests from the best-fitting NAR model for HFMD notified cases series from June 2008 to December 2016. **(a)** Standardized residuals. **(b)** Autocorrelation function (ACF) plot of errors across varying lag times. All of the autocorrelations fail to be beyond the estimated 95% uncertainty bounds around zero across varying lag times apart from the one from ACF plot at zero lag that should occur and also occurring at lag 11, we should not be surprised as this can easily happen by chance alone. Overall, the plot manifests that the network appears to have captured the dependence hidden behind the HFMD notified cases series. **(c)** Input-to-error correlation plot for varying lags. The input-error cross-correlation function illustrates how the residuals are interrelated with the series of  $x(t)$ . All of the correlations fall within the confidence bounds around zero, which hints the developed model is a perfect specification. **(d)** Q-statistic  $P$ -values. Analyses from the plots demonstrate the constructed model is adequate in excavating the information of this time series.

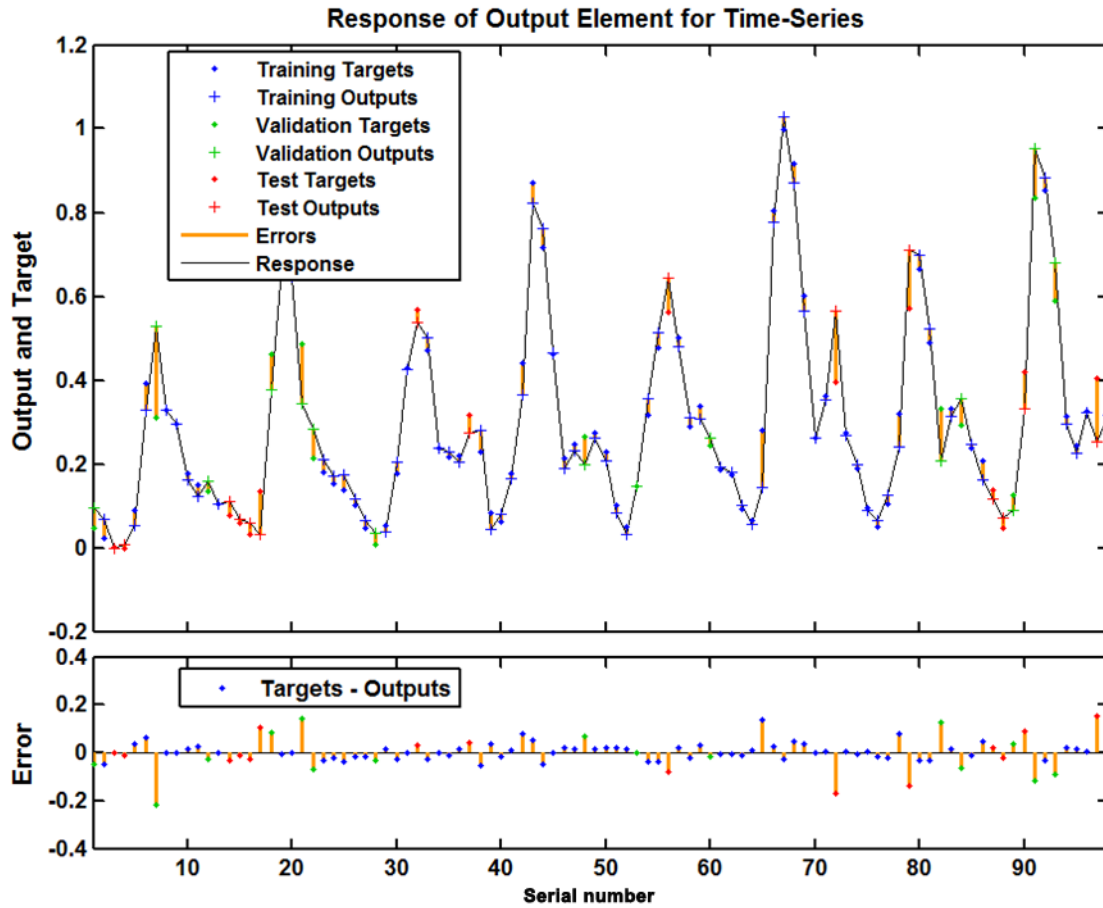

**Figure S17.** The response of output and target for HFMD time series from June 2008 to December 2016 at various time points. This plot exhibits which time points are elected as the training, validation and testing subsets, along with their corresponding errors between inputs and targets. In view of the small errors, a further suggestion that the fitting is fairly accurate.

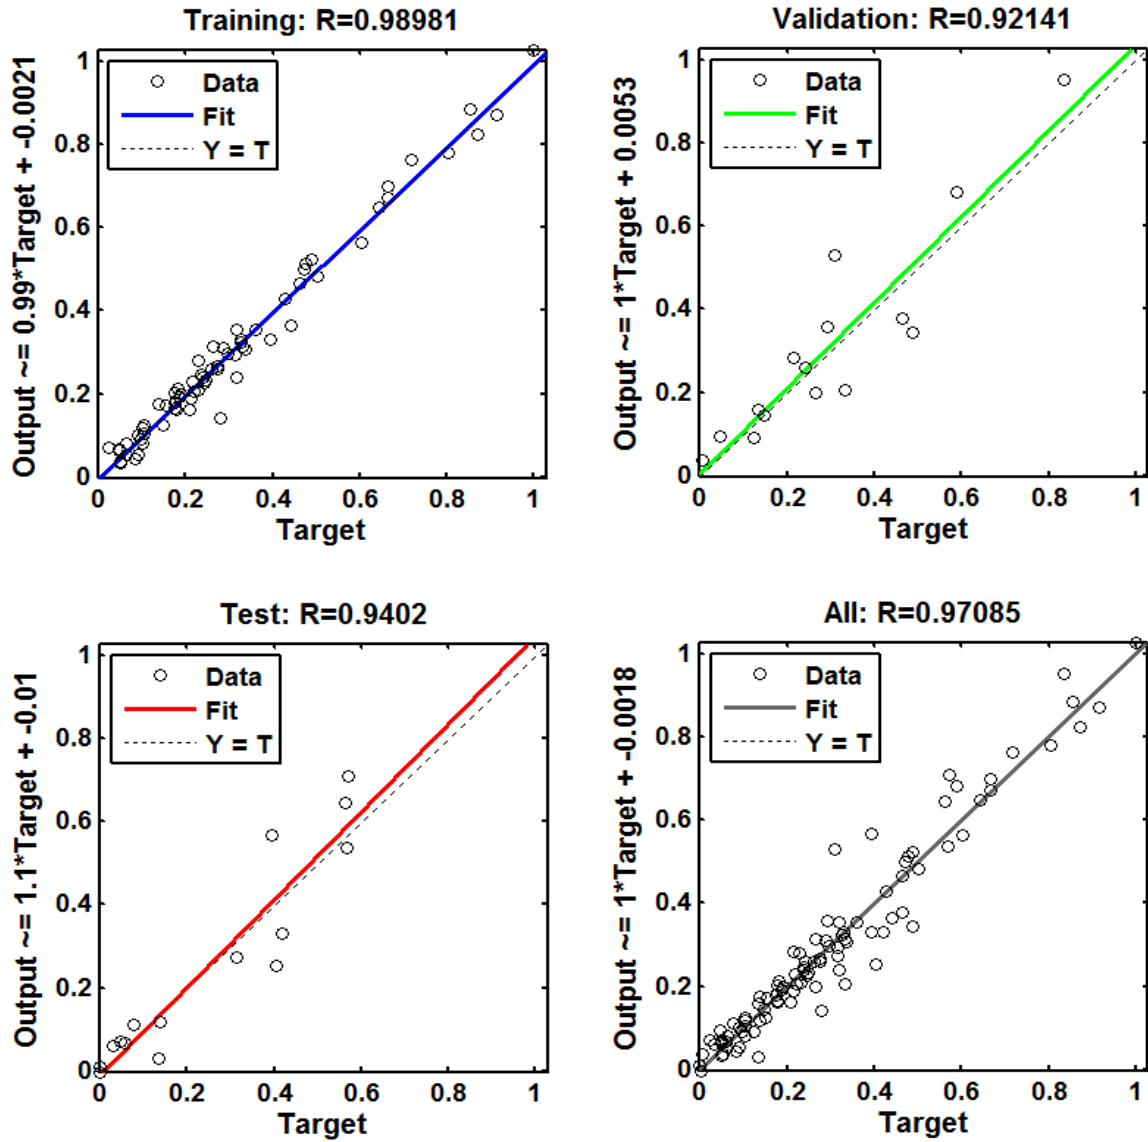

**Figure S18.** The regression plots for the best-fitting NAR model outputs with respect to targets for training, validation, and test in the dataset from June 2008 to December 2016.

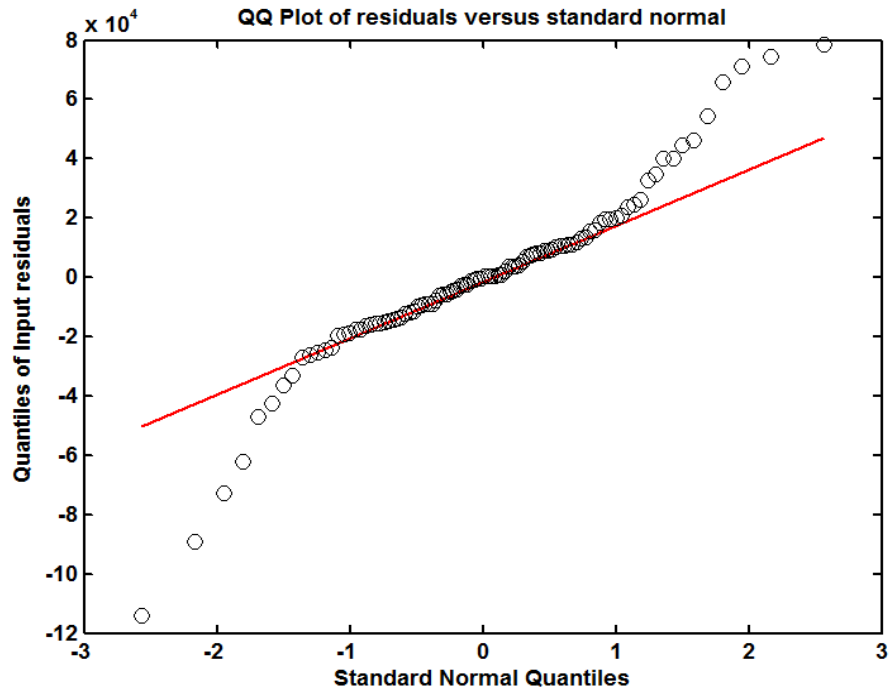

**Figure S19.** The Q-Q plot of residuals from NAR model for HFMD series from June 2008 to December 2016. The Q-Q plot of the residuals shows marked departure from normality at the tails.

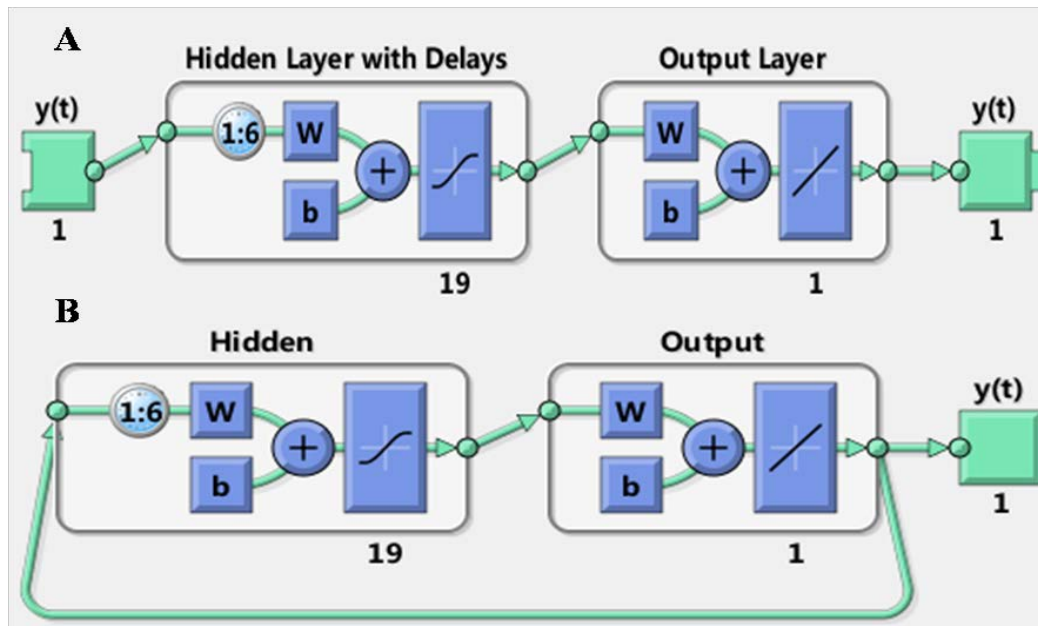

**Figure S20.** The layer architecture of NAR model for HFMD notified cases series from June 2008 to December 2017. (A) The opened loop mode; (B) The closed loop mode. This NAR model is comprised of a hidden layer with 19 neurons and 6 delays and an output layer with 1 neuron. The model adopts tapped delay lines to store prior data of the  $x(t)$  and  $y(t)$  series as well. Among which, the output results of the model,  $y(t)$ , is fed back to the input (through delays), since  $y(t)$  is a function of  $y(t - 1)$ ,  $y(t - 2)$ , ...,  $y(t - d)$ . Nevertheless, in order to train more efficiently, the training can be undertaken in open loop. After training, then the opened loop mode should be transformed to the closed loop mode for multistep-ahead forecasting.

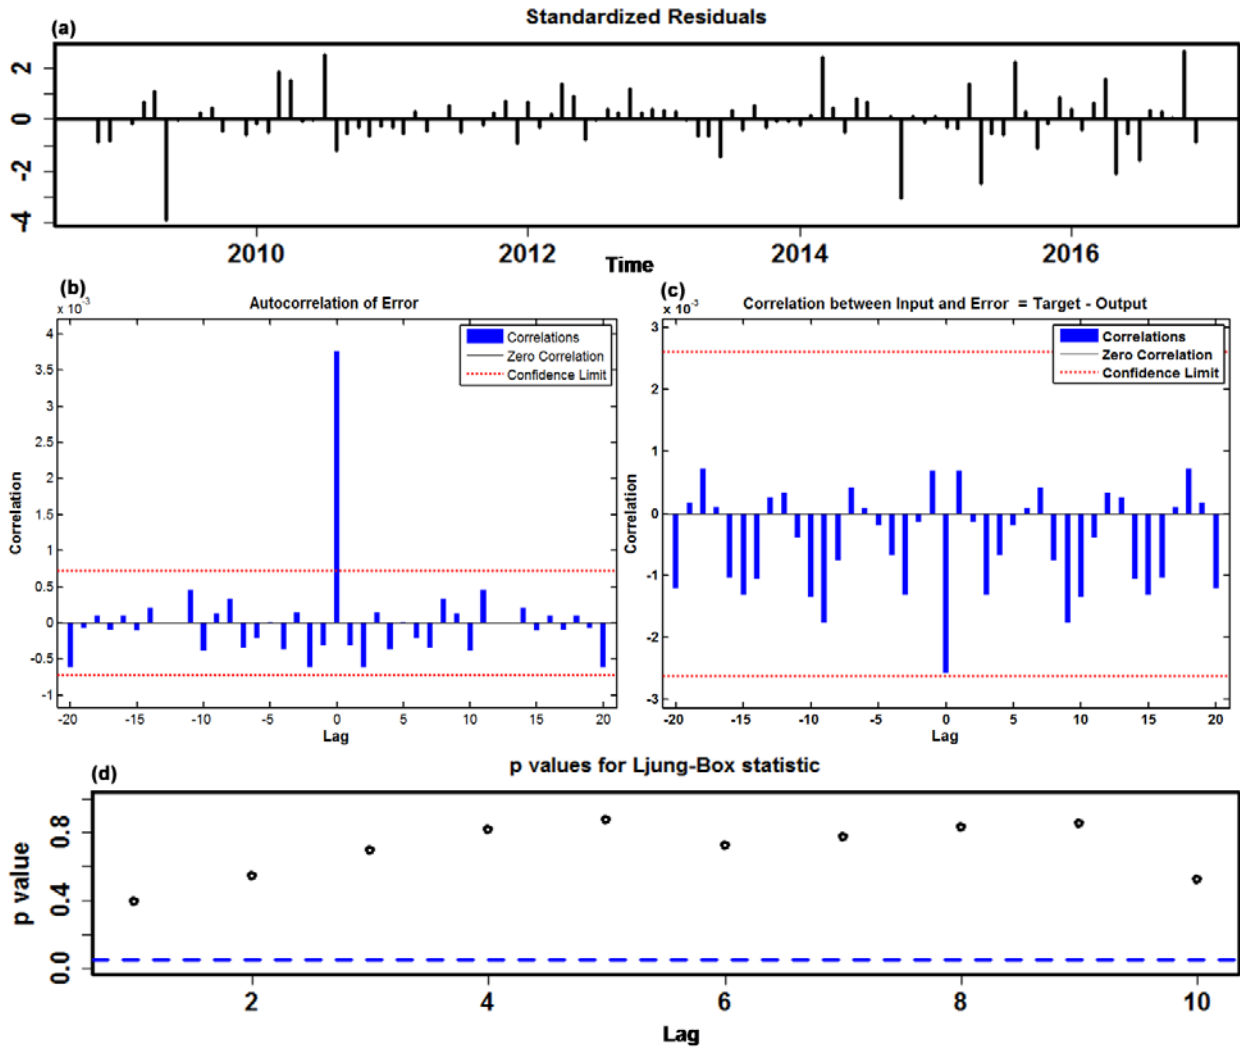

**Figure 21.** The resulting plots of fit goodness tests from the best-fitting NAR model for HFMD notified cases series from June 2008 to December 2017. (a) Standardized residuals. (b) Autocorrelation function (ACF) plot of errors across varying lag times. All of the autocorrelations fail to be beyond the estimated 95% uncertainty bounds around zero across varying lag times apart from the one from ACF plot at zero lag that should occur. The plot manifests that the network appears to have captured the dependence hidden behind the HFMD notified cases series. (c) Input-to-error correlation plot for varying lags. The input-error cross-correlation function illustrates how the residuals are interrelated with the series of  $x(t)$ . All of the correlations fall within the confidence bounds around zero, which hints the developed model is a perfect specification. (d) Q-statistic  $P$ -values. Analyses from the plots demonstrate the constructed model is adequate in excavating the information of this time series.

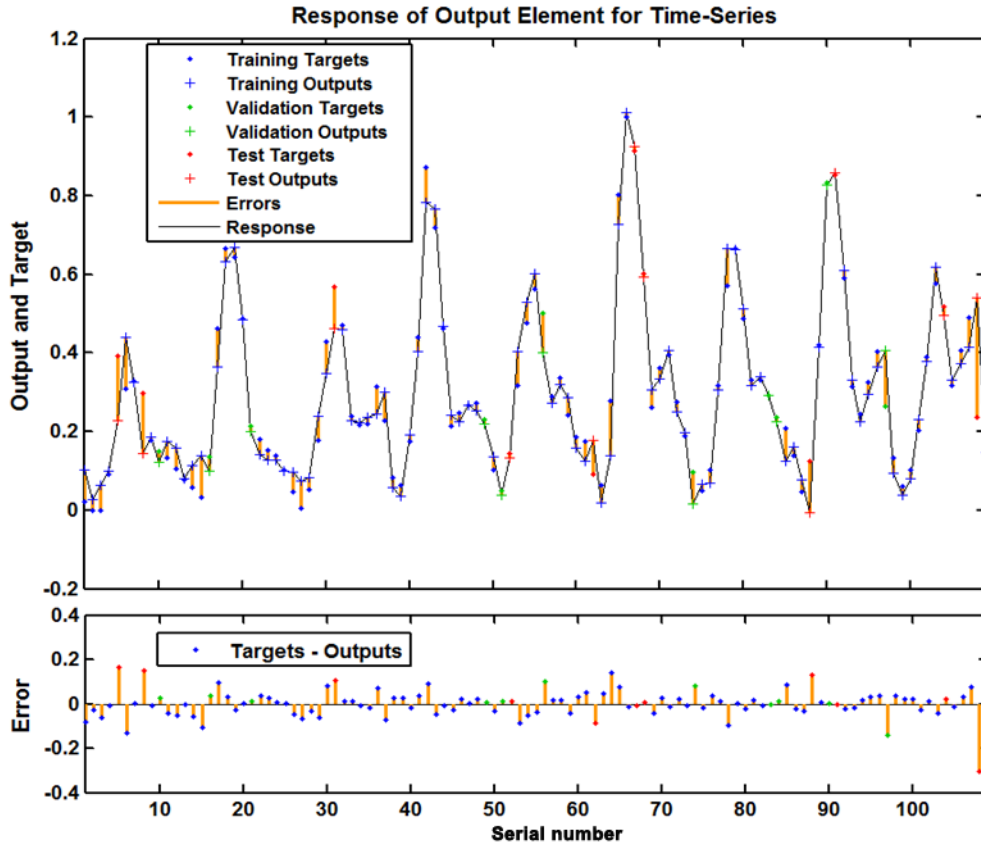

**Figure S22.** The response of output and target for HFMD time series from June 2008 to December 2017 at various time points. This plot exhibits which time points are elected as the training, validation and testing subsets, along with their corresponding errors between inputs and targets. In view of the small errors nearly lying between -0.2 and 0.2, a further suggestion that the fitting is fairly accurate.



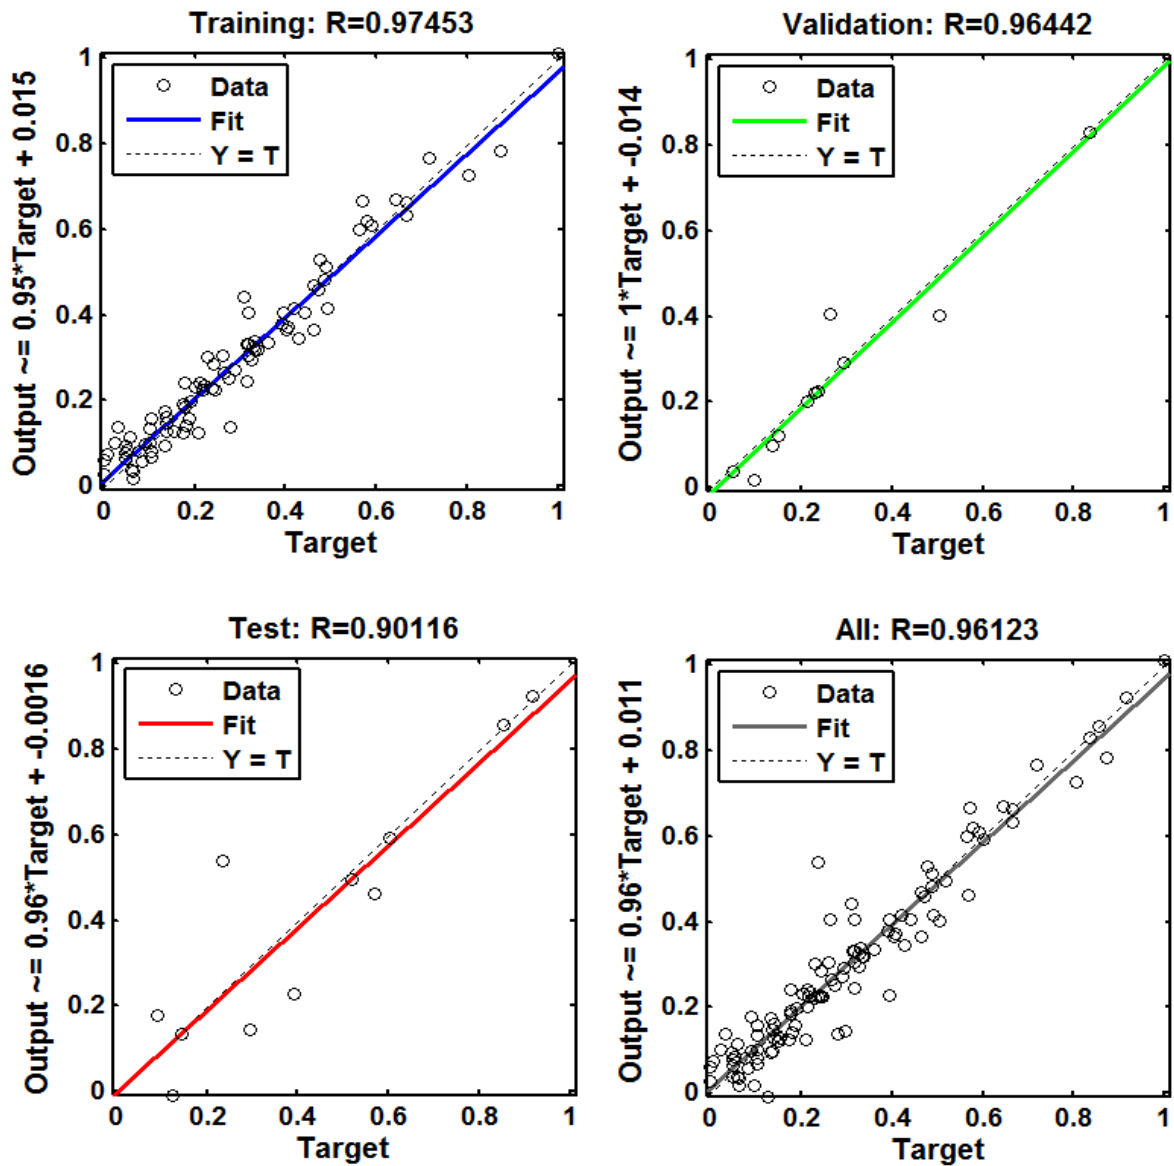

**Figure S23.** The regression plots for the best-fitting NAR model outputs with respect to targets for training, validation, and test in the dataset from June 2008 to December 2017.

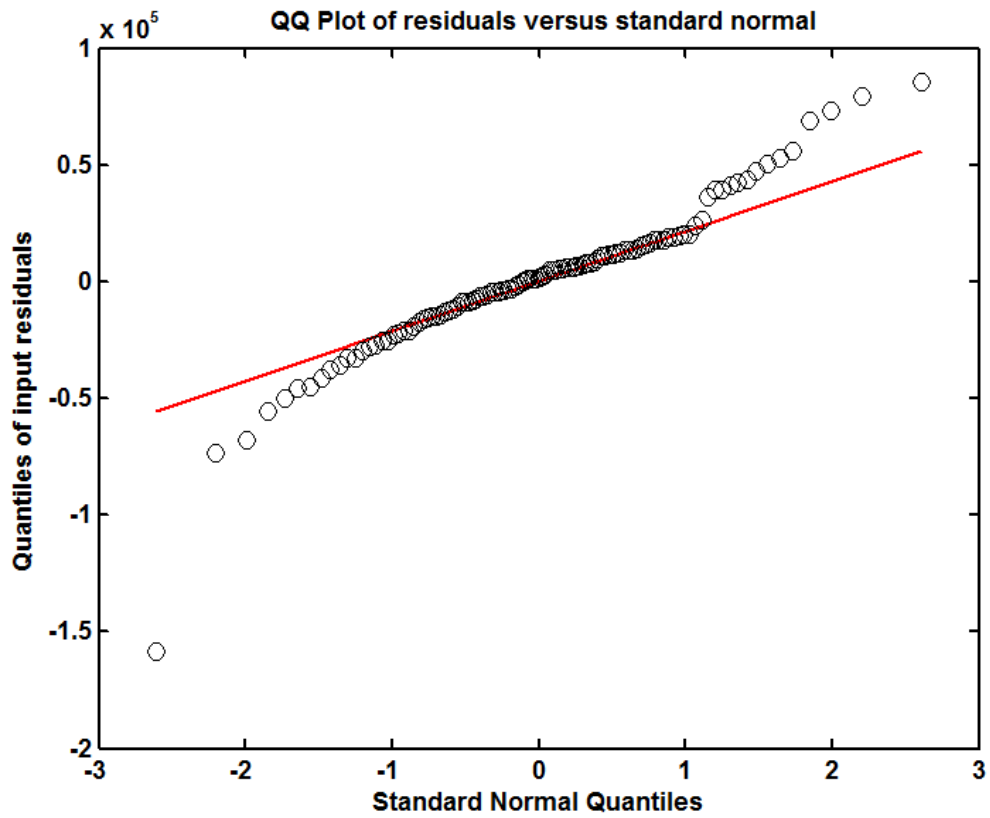

**Figure S24.** The Q-Q plot of residuals from the best-simulating NAR model for HFMD series from June 2008 to December 2017. This plot suggests that the distribution of produced residuals has a tail thicker than that of a normal distribution.

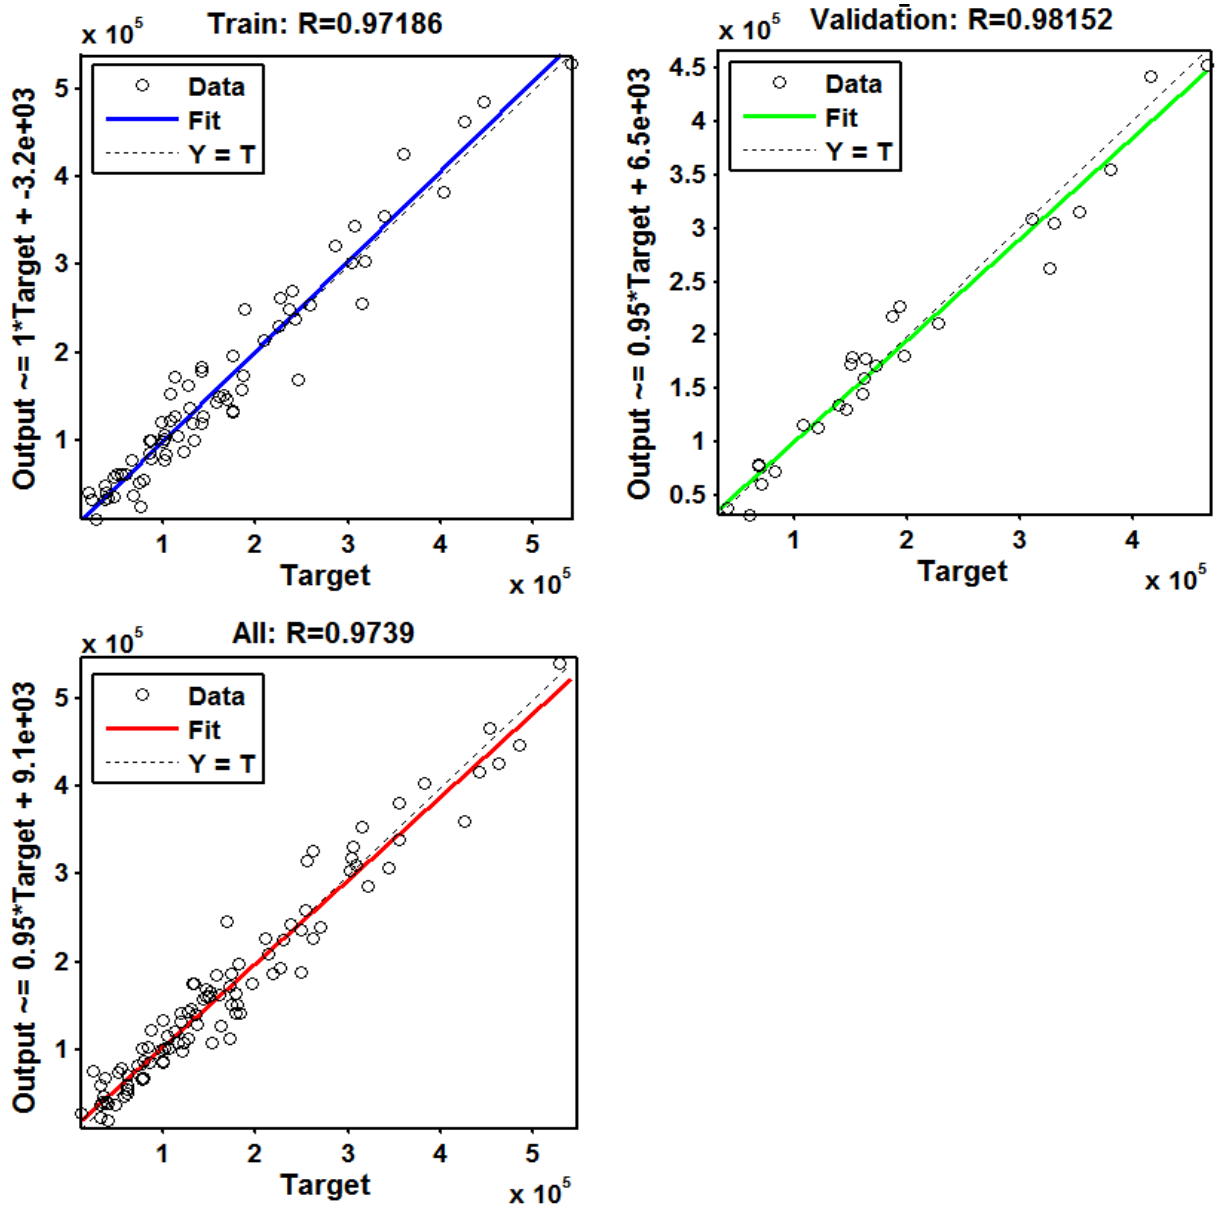

**Figure S25.** The regression plots for the LSTM model outputs with respect to targets for training and validation in the dataset from June 2008 to June 2017.

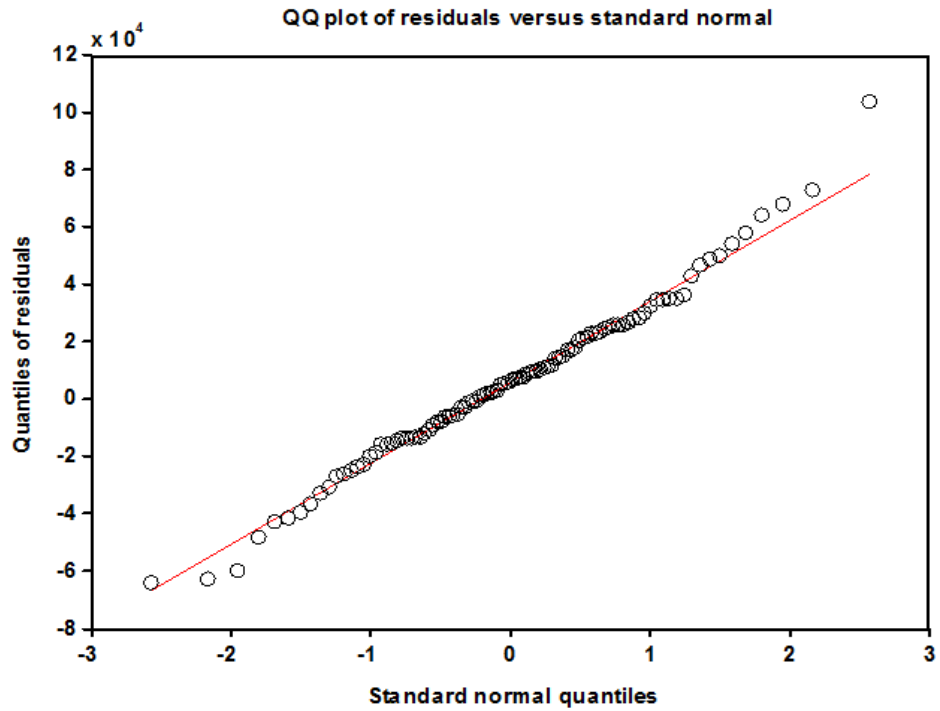

**Figure S26.** The Q-Q plot of residuals from LSTM model for HFMD series from June 2008 to June 2017. As exhibited in the plot of the normal Q-Q plot, the residuals approximately fall along the line. Thus the best-fitting LSTM model improves the normality dramatically compared with the basic NAR and SARIMA methods.

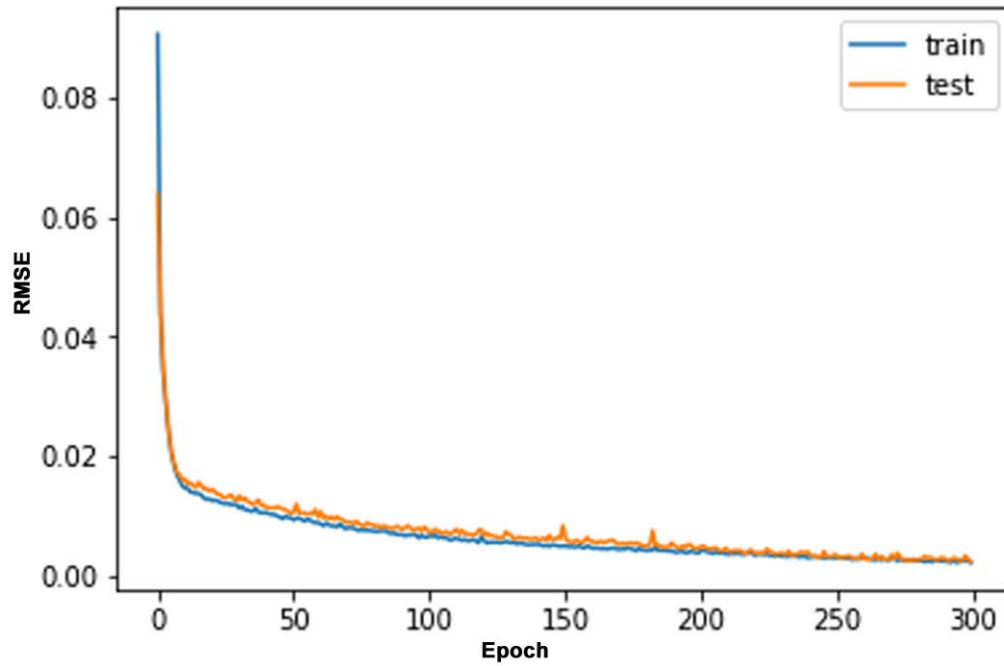

**Figure S27.** The training and validation performances for LSTM model at 300 epochs for the HFMD notified cases series from June 2008 to December 2016. This plot documents that the test set error and the validation set error have similar characteristics and no significant overfitting has occurred by iteration 300.

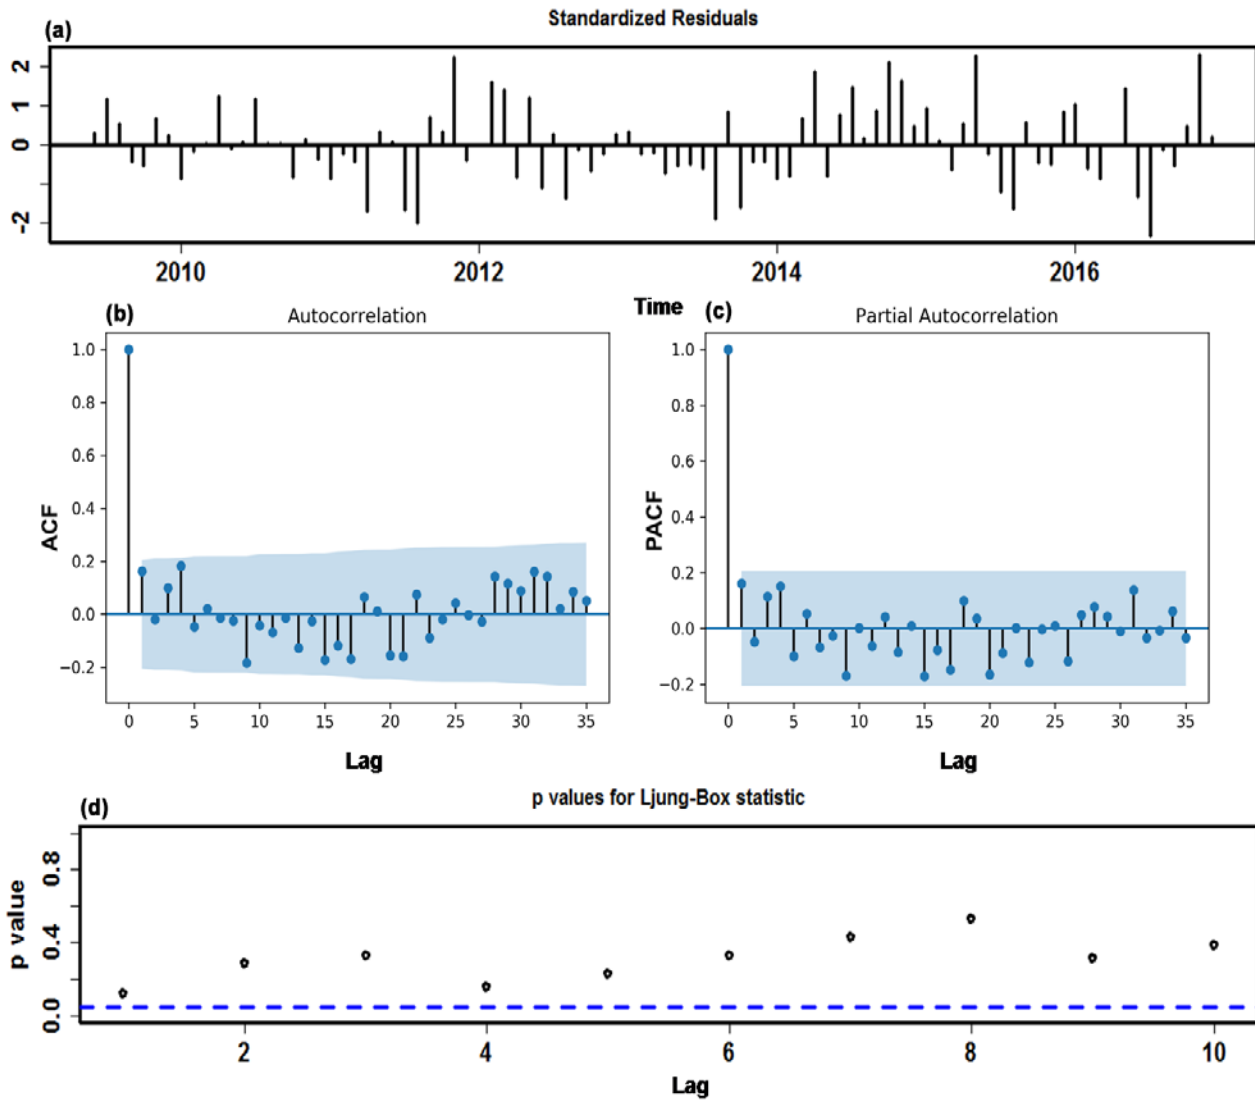

**Figure S28.** The resulting plots of fit goodness tests from the best-performing LSTM model for HFMD notified cases series from June 2008 to December 2016. (a) Standardized residuals. (b) Autocorrelation function (ACF) plot of errors across varying lag times. The ACF plot of forecasted errors reveals no individually evident autocorrelation at varying lags except for the one from ACF plot at zero lag that should occur. (c) Partial autocorrelation function (PACF) plot of residuals. (d) Q-statistic  $P$ -values. As shown, All  $P$ -values are larger than 0.05. These diagnostics manifest that the network is well suited to the dataset.

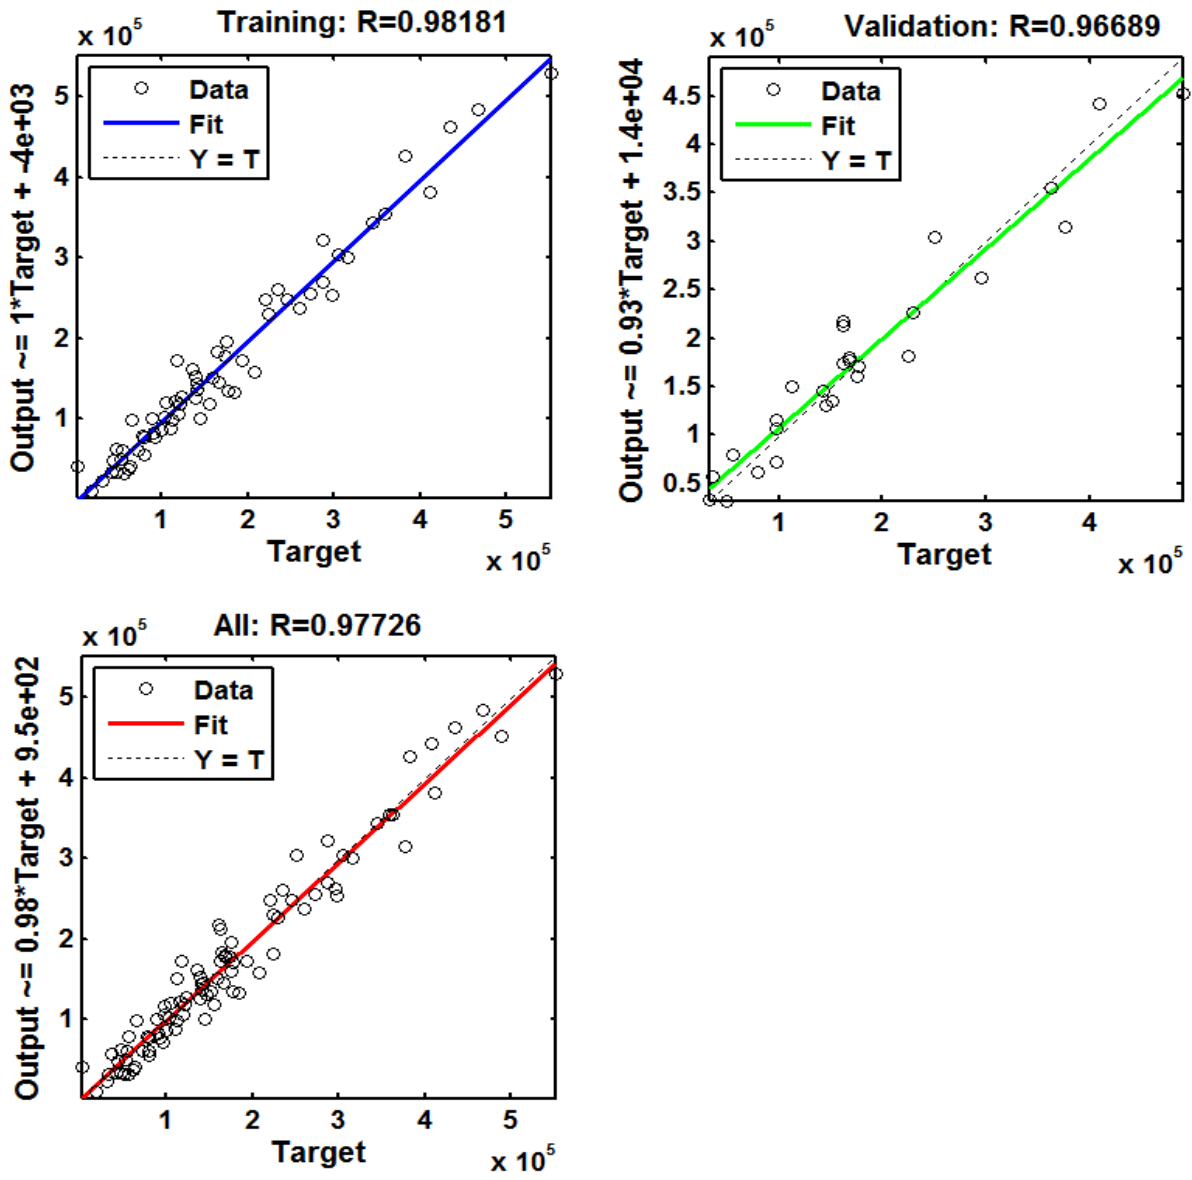

**Figure S29.** The regression plots for the best-presenting LSTM model outputs with respect to targets for training and validation in the dataset from June 2008 to December 2016.

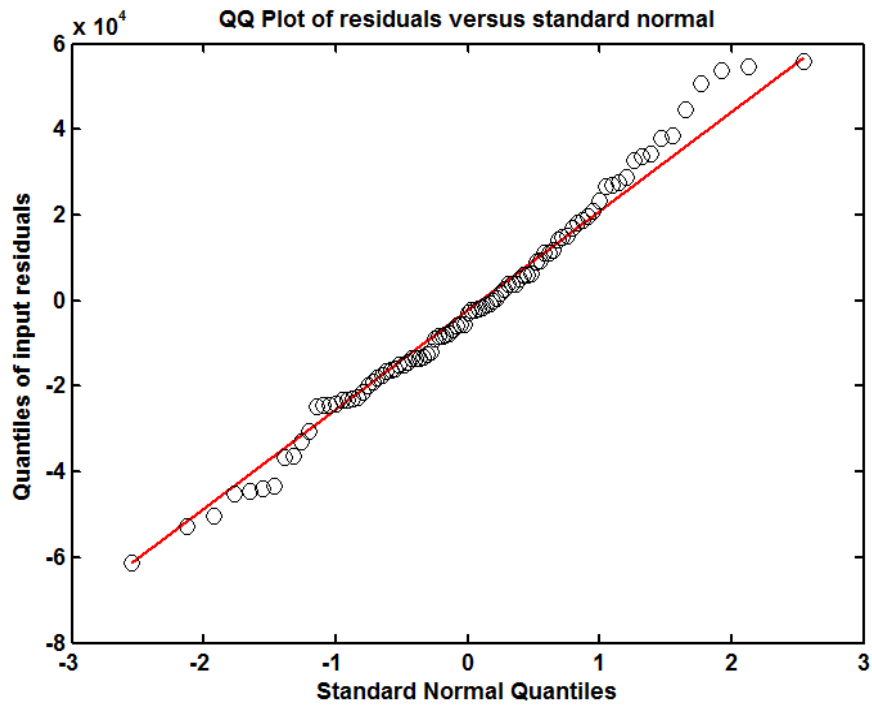

**Figure S30.** The Q-Q plot of residuals from LSTM model for HFMD series from June 2008 to December 2016. As exhibited in the plot of the normal Q-Q plot, the points seem to follow the straight line fairly closely. This graph would not lead us to reject normality of the error terms in this model. Thus the best-fitting LSTM model improves the normality dramatically compared with the basic NAR and SARIMA methods.



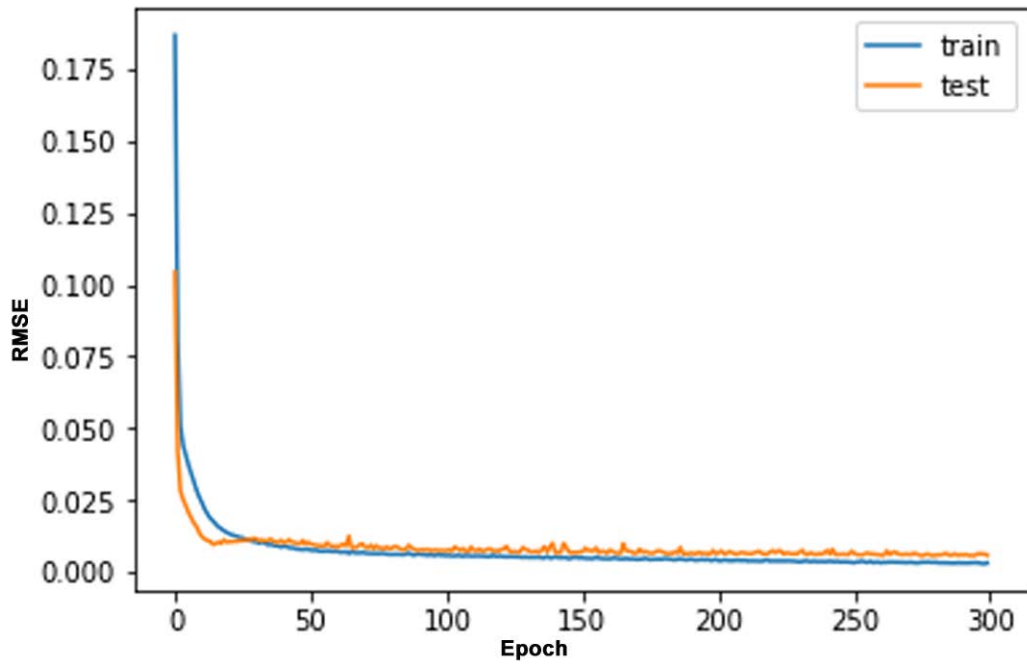

**Figure S31.** The training and validation performances for LSTM model at 300 epochs for the HFMD notified cases series from June 2008 to December 2017. This plot documents that the test set error and the validation set error have similar characteristics and no significant overfitting has occurred by iteration 300.

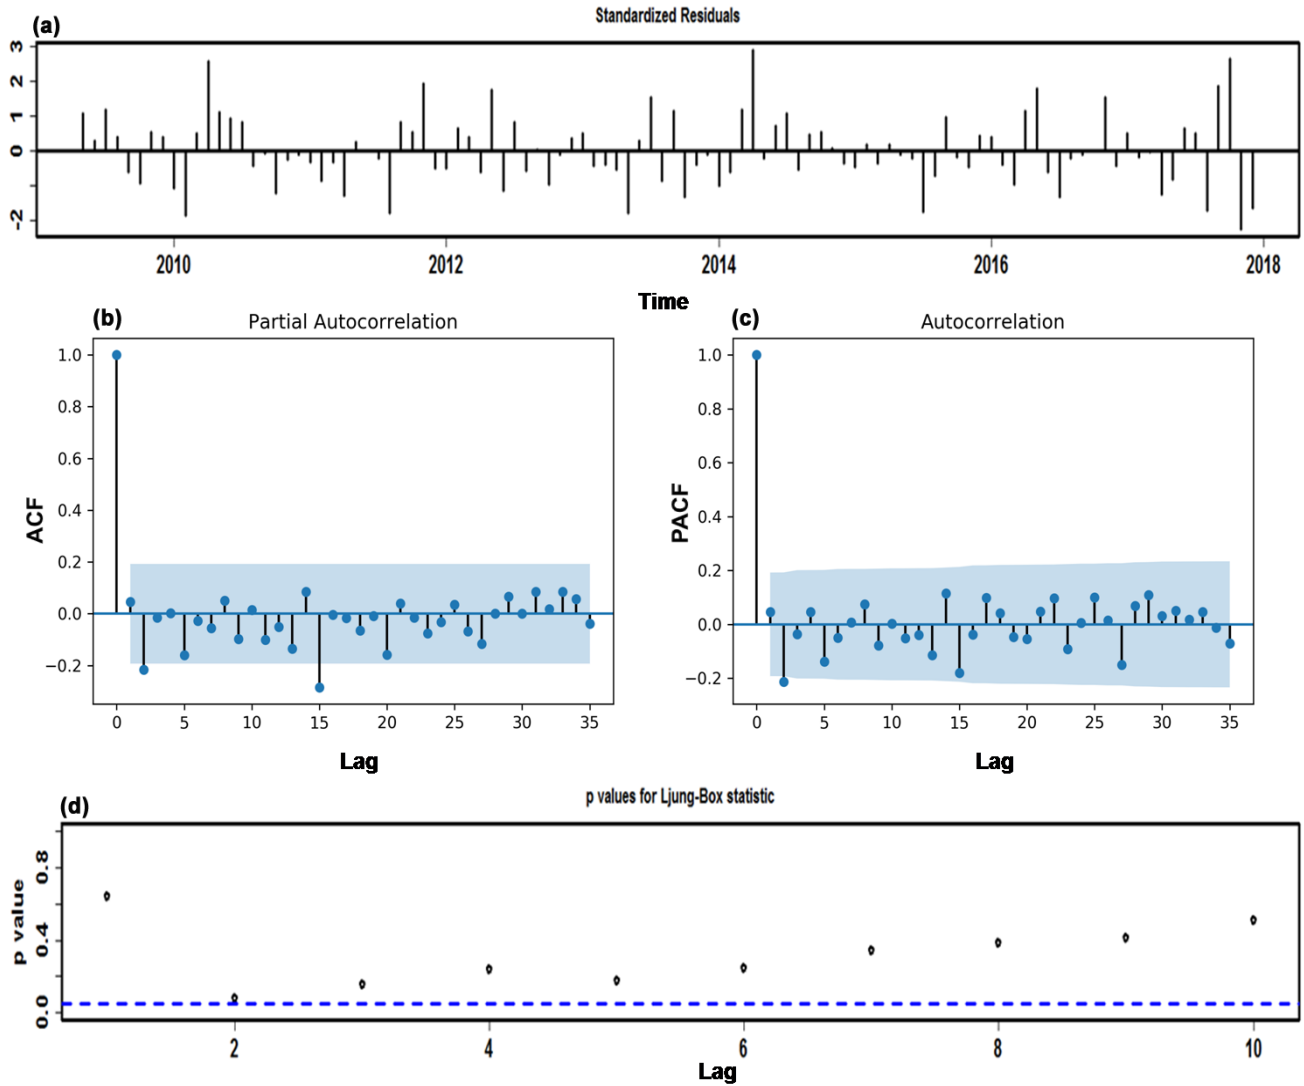

**Figure S32.** The resulting plots of fit goodness tests from the LSTM model for HFMD notified cases series from June 2008 to December 2017. **(a)** Standardized residuals. **(b)** Autocorrelation function (ACF) plot of errors across varying lag times. The ACF plot of forecasted errors reveals no individually evident autocorrelation at varying lags except for the two points occurring at lags 2 and 15. For these two lagged points out of the estimated 95% confidence limit, they are also reasonable as this phenomenon can easily happen by chance alone. **(c)** Partial autocorrelation function (PACF) plot of residuals. **(d)** Q-statistic  $P$ -values. As shown, All  $P$ -values are larger than 0.05. These diagnostics manifest that the network is well suited to the dataset.

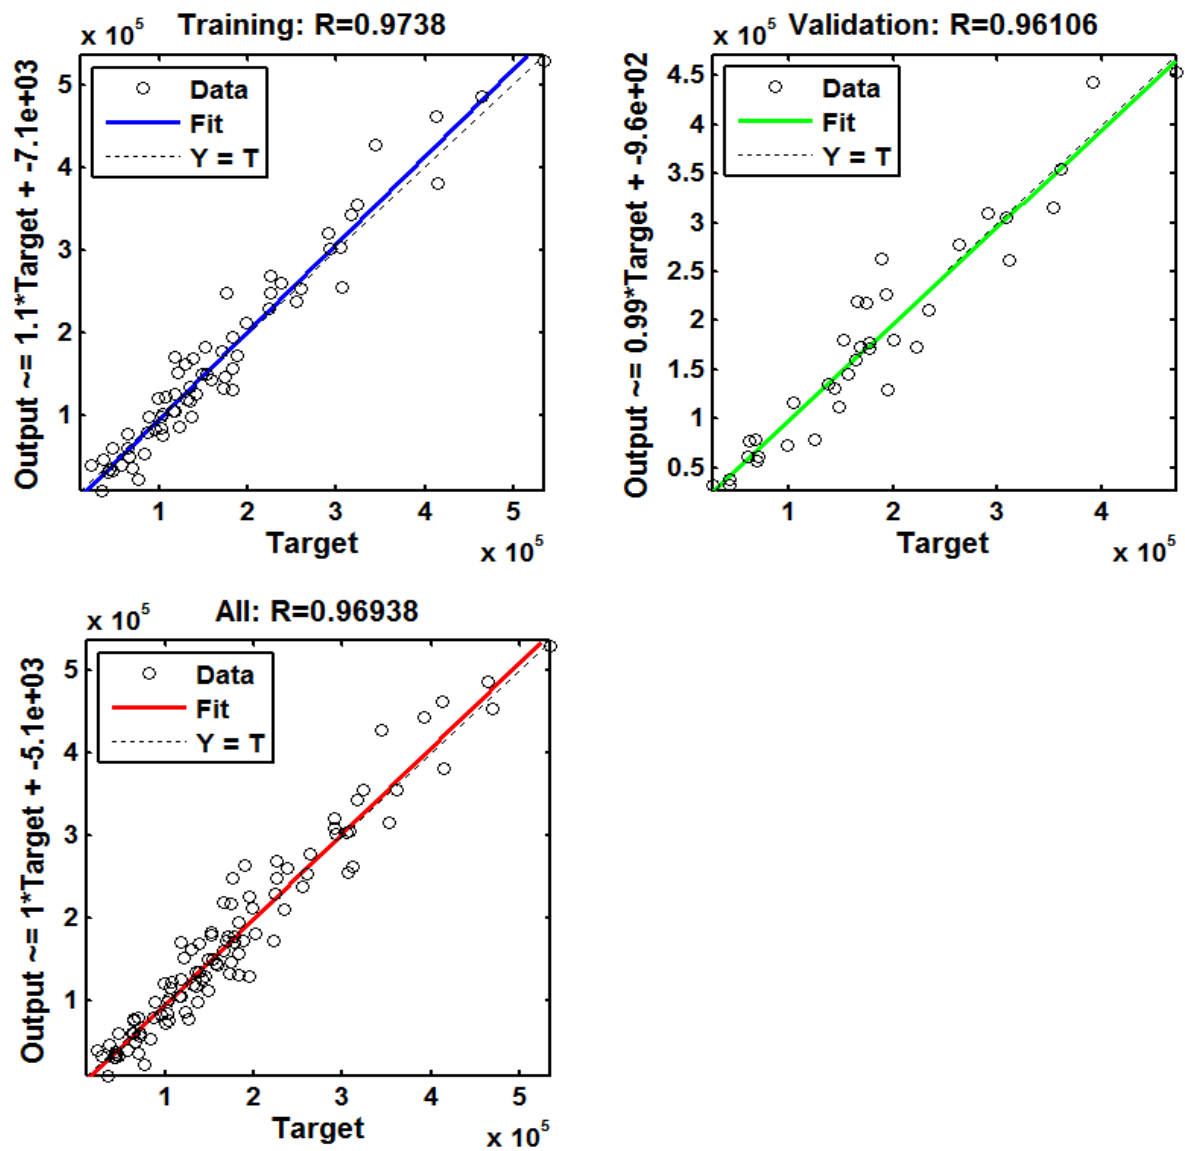

**Figure S33.** The regression plots for the best-presenting LSTM model outputs with respect to targets for training and validation in the dataset from June 2008 to December 2017.

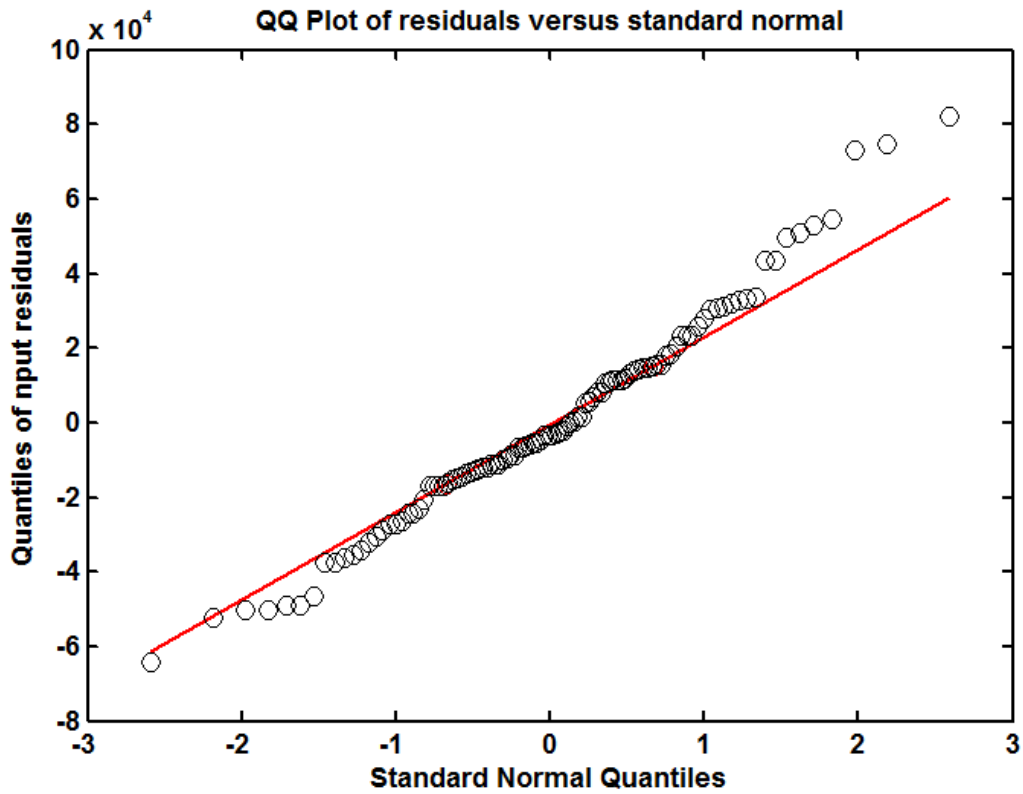

**Figure S34.** The Q-Q plot of residuals from LSTM model for HFMD series from June 2008 to December 2017. The Q-Q plot suggests that the distribution of errors may have a tail thicker than that of a normal distribution and may be somewhat skewed to the right. However, In comparison with the best-mimicking NAR and SARIMA approaches, the best-fitting LSTM model can improve the normality dramatically.

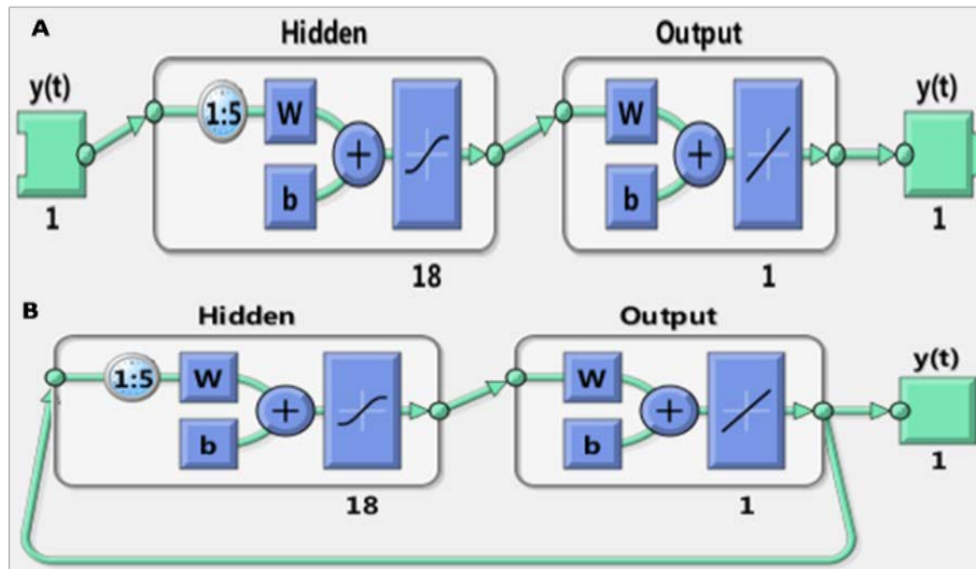

**Figure S35.** The layer architecture of NAR model for the HFMD notified cases series from June 2008 to June 2017. (A) The opened loop mode; (B) The closed loop mode. This NAR model is comprised of a hidden layer with 18 neurons and 5 delays and an output layer with 1 neuron. The model adopts tapped delay lines to store prior data of the  $x(t)$  and  $y(t)$  series as well. Among which, the output results of the model,  $y(t)$ , is fed back to the input (through delays), since  $y(t)$  is a function of  $y(t - 1)$ ,  $y(t - 2)$ , ...,  $y(t - d)$ . Nevertheless, in order to train more efficiently, the training can be undertaken in open loop. After training, then the opened loop mode should be transformed to the closed loop mode for multistep-ahead forecasting.

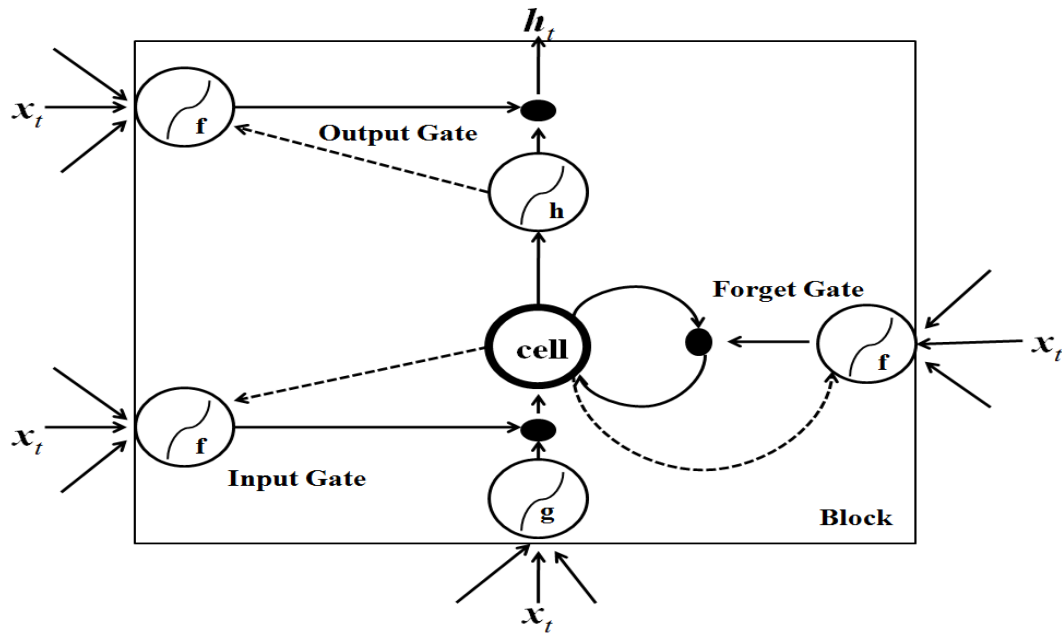

**Figure S36.** The layer architecture of LSTM model. Above-mentioned these gates represent nonlinear summation units that gather activations from inside and outside the block, and dominate the activation of the cell via multiplications (small black circles). The input and output gates multiply the cell's input and output when the forget gate multiplies the earlier state of the cell. The gate activation function 'f' ordinarily refers to the logistic sigmoid, which can limit the gate activations into [0, 1] intervals. The cell input and output activation functions ('g' and 'h') customarily stand for tanh or logistic sigmoid. In this layer architecture, dashed lines are the weighted join points from the cell to the gates, the remainder of lines within the block denote the unweighted join points. The only outputs from the block to the remaining the network emanate from the output gate multiplication.

| Models                            | Estimated parameter coefficients of candidate models |         |         |         |         |         |        | Performance indexes of candidate models |         |         |
|-----------------------------------|------------------------------------------------------|---------|---------|---------|---------|---------|--------|-----------------------------------------|---------|---------|
|                                   | AR1                                                  | AR2     | MA1     | MA2     | SAR1    | SMA1    | SMA2   | AIC                                     | AICc    | BIC     |
| ARIMA(1,0,1)(0,1,1) <sub>12</sub> | 0.6358                                               |         | 0.4441  |         |         | -0.6747 |        | 2364.50                                 | 2364.94 | 2374.8  |
|                                   | 0.1022                                               |         | 0.1055  |         |         | 0.1324  |        |                                         |         |         |
| ARIMA(2,1,1)(0,0,2) <sub>12</sub> | 1.0877                                               | -0.5008 | -0.964  |         |         | 0.6641  | 0.6982 | 2629.47                                 | 2630.3  | 2645.56 |
|                                   | 0.0897                                               | 0.0895  | 0.0275  |         |         | 0.1246  | 0.1687 |                                         |         |         |
| ARIMA(2,1,1)(1,1,0) <sub>12</sub> | 0.8218                                               | -0.2785 | -0.9332 |         | -0.6009 |         |        | 2340.16                                 | 2340.83 | 2352.98 |
|                                   | 0.1158                                               | 0.1079  | 0.0498  |         | 0.0869  |         |        |                                         |         |         |
| ARIMA(1,1,2)(1,1,0) <sub>12</sub> | 0.4344                                               |         | -0.5235 | -0.3938 | -0.6001 |         |        | 2339.41                                 | 2340.08 | 2352.23 |
|                                   | 0.1477                                               |         | 0.141   | 0.1221  | 0.0874  |         |        |                                         |         |         |

**Table S1.** The estimated parameters and performance indexes for the selected candidate models based on the original observations from June 2008 to June 2017.

| Parameters | Coefficient | Standard error | <i>t</i> | <i>P</i> |
|------------|-------------|----------------|----------|----------|
| AR1        | 0.484       | 0.121          | 3.992    | <0.001   |
| MA1        | -0.432      | 0.133          | -3.256   | 0.002    |
| SAR1       | -0.949      | 0.088          | -10.827  | <0.001   |
| SMA1       | -0.707      | 0.226          | -3.131   | 0.002    |

**Table S2.** Estimated parameters of the SARIMA(1,0,1)(1,1,1)<sub>12</sub> model for the target series from June 2008 to December 2016.



| Model                              | R <sup>2</sup> | Log-Likelihood | AIC      | BIC      | Normalized<br>BIC | Ljung-Box <i>Q</i> |          |
|------------------------------------|----------------|----------------|----------|----------|-------------------|--------------------|----------|
|                                    |                |                |          |          |                   | Statistics         | <i>P</i> |
| SARIMA(1,0,1)(1,1,1) <sub>12</sub> | 0.864          | -1099.009      | 2208.018 | 2220.572 | 21.602            | 8.761              | 0.846    |

**Table S3.** The goodness of fit test of the preferred SARIMA model for the target series from June 2008 to December 2016.

| Lags | Residuals of SARIMA model |       | Residuals of NAR model |       | Residuals of LSTM model |       |
|------|---------------------------|-------|------------------------|-------|-------------------------|-------|
|      | Box-Ljung $Q$             | $P$   | Box-Ljung $Q$          | $P$   | Box-Ljung $Q$           | $P$   |
| 1    | 0.098                     | 0.754 | 0.727                  | 0.394 | 2.468                   | 0.116 |
| 3    | 0.112                     | 0.990 | 1.448                  | 0.694 | 3.467                   | 0.325 |
| 6    | 1.842                     | 0.934 | 3.647                  | 0.724 | 6.959                   | 0.325 |
| 9    | 2.761                     | 0.973 | 4.769                  | 0.854 | 10.473                  | 0.314 |
| 12   | 4.448                     | 0.974 | 11.757                 | 0.465 | 11.179                  | 0.514 |
| 15   | 7.537                     | 0.941 | 13.361                 | 0.574 | 16.304                  | 0.362 |
| 18   | 8.761                     | 0.965 | 13.750                 | 0.745 | 21.606                  | 0.250 |
| 21   | 9.719                     | 0.982 | 17.062                 | 0.707 | 27.494                  | 0.155 |
| 24   | 15.157                    | 0.916 | 17.108                 | 0.844 | 29.205                  | 0.213 |
| 27   | 20.138                    | 0.825 | 17.750                 | 0.911 | 29.529                  | 0.336 |
| 30   | 22.854                    | 0.821 | 18.064                 | 0.957 | 35.149                  | 0.237 |
| 33   | 25.308                    | 0.829 | 19.470                 | 0.970 | 41.780                  | 0.141 |
| 36   | 37.095                    | 0.418 | 20.658                 | 0.981 | 43.404                  | 0.185 |

**Table S4.** Ljung-Box  $Q$  test of the residuals for the selected three optimal models fitted to the notified HFMD cases series from June 2008 to December 2016 at different lags.

| Lags | Observed values |          | Residuals of SARIMA model |          | Residuals of NAR model |          | Residuals of LSTM model |          |
|------|-----------------|----------|---------------------------|----------|------------------------|----------|-------------------------|----------|
|      | LM-test         | <i>P</i> | LM-test                   | <i>P</i> | LM-test                | <i>P</i> | LM-test                 | <i>P</i> |
| 1    | 51.644          | <0.001   | 0.136                     | 0.712    | 0.086                  | 0.769    | 0.490                   | 0.484    |
| 3    | 69.573          | <0.001   | 1.369                     | 0.713    | 1.257                  | 0.739    | 2.846                   | 0.416    |
| 6    | 68.356          | <0.001   | 3.151                     | 0.790    | 2.346                  | 0.885    | 8.744                   | 0.189    |
| 9    | 66.675          | <0.001   | 9.611                     | 0.383    | 8.095                  | 0.525    | 8.534                   | 0.481    |
| 12   | 68.750          | <0.001   | 23.007                    | 0.028    | 9.550                  | 0.655    | 9.393                   | 0.669    |
| 15   | 66.862          | <0.001   | 22.851                    | 0.087    | 20.477                 | 0.154    | 10.494                  | 0.788    |
| 18   | 64.808          | <0.001   | 22.901                    | 0.194    | 20.832                 | 0.288    | 17.173                  | 0.511    |
| 21   | 62.946          | <0.001   | 23.073                    | 0.340    | 21.474                 | 0.430    | 22.333                  | 0.381    |
| 24   | 69.134          | <0.001   | 16.840                    | 0.855    | 23.266                 | 0.504    | 23.755                  | 0.476    |
| 27   | 66.728          | <0.001   | 18.047                    | 0.902    | 25.234                 | 0.561    | 27.193                  | 0.453    |
| 30   | 64.059          | <0.001   | 20.507                    | 0.903    | 30.052                 | 0.463    | 29.736                  | 0.479    |
| 33   | 61.471          | 0.002    | 20.835                    | 0.951    | 33.224                 | 0.456    | 36.300                  | 0.317    |
| 36   | 59.046          | 0.010    | 31.915                    | 0.663    | 32.765                 | 0.623    | 38.356                  | 0.363    |

**Table S5.** ARCH effect of the observations and residuals of the selected three models fitted to the notified HFMD cases series from June 2008 to December 2016 with LM test at various lags.

| Parameters | Coefficient | Standard error | <i>t</i> | <i>P</i> |
|------------|-------------|----------------|----------|----------|
| AR1        | 0.377       | 0.127          | 2.968    | 0.004    |
| MA1        | -0.504      | 0.124          | -4.070   | <0.001   |
| SAR1       | -0.938      | 0.076          | -12.299  | <0.001   |
| SMA1       | -0.653      | 0.189          | -3.446   | 0.001    |

**Table S6.** Estimated parameters of the SARIMA(1,0,1)(1,1,1)<sub>12</sub> model for the target series from June 2008 to December 2017.

| Model                              | R <sup>2</sup> | Log-Likelihood | AIC      | BIC      | Normalized<br>BIC | Ljung-Box <i>Q</i> |          |
|------------------------------------|----------------|----------------|----------|----------|-------------------|--------------------|----------|
|                                    |                |                |          |          |                   | Statistics         | <i>P</i> |
| SARIMA(1,0,1)(1,1,1) <sub>12</sub> | 0.850          | -1246.389      | 2502.777 | 2515.951 | 221.621           | 8.005              | 0.889    |

**Table S7.** The goodness of fit test of the preferred SARIMA model for target series from June 2008 to December 2017.

| Lags | Residuals of SARIMA model |       | Residuals of NAR model |       | Residuals of LSTM model |       |
|------|---------------------------|-------|------------------------|-------|-------------------------|-------|
|      | Box-Ljung $Q$             | $P$   | Box-Ljung $Q$          | $P$   | Box-Ljung $Q$           | $P$   |
| 1    | 0.118                     | 0.732 | 0.759                  | 0.384 | 0.224                   | 0.636 |
| 3    | 0.324                     | 0.955 | 3.863                  | 0.277 | 5.272                   | 0.153 |
| 6    | 2.104                     | 0.910 | 5.326                  | 0.503 | 7.925                   | 0.244 |
| 9    | 2.499                     | 0.981 | 7.134                  | 0.623 | 9.273                   | 0.412 |
| 12   | 3.561                     | 0.990 | 9.655                  | 0.646 | 9.764                   | 0.637 |
| 15   | 6.688                     | 0.966 | 10.026                 | 0.818 | 16.989                  | 0.320 |
| 18   | 8.005                     | 0.979 | 10.203                 | 0.925 | 18.592                  | 0.417 |
| 21   | 8.175                     | 0.994 | 13.032                 | 0.908 | 19.564                  | 0.549 |
| 24   | 13.966                    | 0.947 | 13.537                 | 0.956 | 22.010                  | 0.579 |
| 27   | 21.492                    | 0.763 | 19.289                 | 0.859 | 26.655                  | 0.483 |
| 30   | 26.035                    | 0.673 | 21.828                 | 0.860 | 29.237                  | 0.505 |
| 33   | 29.036                    | 0.665 | 22.238                 | 0.922 | 29.997                  | 0.617 |
| 36   | 36.294                    | 0.455 | 24.456                 | 0.928 | 31.024                  | 0.704 |

**Table S8.** Ljung-Box  $Q$  test of the residuals for the selected three optimal models fitted to the notified HFMD cases series from June 2008 to December 2017 at different lags.

| Lags | Observed values |          | Residuals of SARIMA model |          | Residuals of NAR model |          | Residuals of LSTM model |          |
|------|-----------------|----------|---------------------------|----------|------------------------|----------|-------------------------|----------|
|      | LM-test         | <i>P</i> | LM-test                   | <i>P</i> | LM-test                | <i>P</i> | LM-test                 | <i>P</i> |
| 1    | 56.835          | <0.001   | 0.149                     | 0.700    | 0.007                  | 0.935    | 3.915                   | 0.048    |
| 3    | 76.751          | <0.001   | 1.915                     | 0.590    | 0.076                  | 0.995    | 6.659                   | 0.084    |
| 6    | 75.713          | <0.001   | 3.286                     | 0.772    | 2.735                  | 0.841    | 10.869                  | 0.093    |
| 9    | 74.335          | <0.001   | 9.033                     | 0.434    | 3.608                  | 0.935    | 13.567                  | 0.139    |
| 12   | 76.560          | <0.001   | 21.081                    | 0.049    | 14.431                 | 0.274    | 14.193                  | 0.289    |
| 15   | 74.759          | <0.001   | 22.480                    | 0.096    | 17.071                 | 0.315    | 17.653                  | 0.281    |
| 18   | 73.311          | <0.001   | 23.535                    | 0.171    | 20.457                 | 0.308    | 18.243                  | 0.440    |
| 21   | 71.764          | <0.001   | 24.852                    | 0.254    | 23.826                 | 0.302    | 18.519                  | 0.616    |
| 24   | 78.650          | <0.001   | 20.394                    | 0.674    | 25.552                 | 0.376    | 21.187                  | 0.628    |
| 27   | 76.543          | <0.001   | 22.363                    | 0.719    | 26.888                 | 0.470    | 21.474                  | 0.764    |
| 30   | 73.909          | <0.001   | 25.407                    | 0.705    | 32.506                 | 0.344    | 23.564                  | 0.791    |
| 33   | 71.239          | <0.001   | 25.942                    | 0.804    | 31.970                 | 0.518    | 26.177                  | 0.795    |
| 36   | 69.310          | 0.001    | 33.405                    | 0.593    | 33.669                 | 0.580    | 32.374                  | 0.642    |

**Table S9.** ARCH effect of the observations and residuals of the selected three models fitted to the notified HFMD cases series from June 2008 to December 2017 with LM test at various lags.

| Target series | Hidden units | Delays | MSE*     |            |         |         | R        |            |         |         |
|---------------|--------------|--------|----------|------------|---------|---------|----------|------------|---------|---------|
|               |              |        | Training | Validation | Testing | Overall | Training | Validation | Testing | Overall |
| TS1           | 17           | 5      | 0.0011   | 0.0088     | 0.0068  | 0.0032  | 0.990    | 0.921      | 0.940   | 0.971   |
| TS2           | 19           | 6      | 0.0022   | 0.0035     | 0.0164  | 0.0038  | 0.975    | 0.964      | 0.901   | 0.961   |

*Note:* \* represents the values of the mean square error(MAE), which are computed based on the processed data with normalized approach; TS1 stands for the reported HFMD cases series from June 2008 to December 2016; TS2 refers to the reported HFMD cases series from June 2008 to December 2017.

**Table S10.** The preferred NAR models' parameters of various target series.



| Target series | Hidden neurons | time steps | MSE*     |            | R          |         |         |
|---------------|----------------|------------|----------|------------|------------|---------|---------|
|               |                |            | Training | Validation | Validation | Testing | Overall |
| TS1           | 6              | 12         | 0.0022   | 0.0024     | 0.982      | 0.967   | 0.977   |
| TS2           | 5              | 5          | 0.0031   | 0.0058     | 0.974      | 0.961   | 0.969   |

*Note:* \* represents the values of the mean square error(MAE), which are computed based on the processed data with normalized approach; TS1 stands for the reported HFMD cases series from June 2008 to December 2016; TS2 refers to the reported HFMD cases series from June 2008 to December 2017;

**Table S11.** The preferred LSTM models' parameters of various target series.

**Table S12.** Future one hundred possible sample paths for the HFMD notified data in mainland China. This Table was provided in a Microsoft Excel.xlsx version on account of the plethora of data.
